# Supplementary material for: ACSS2 gene variants determine kidney disease risk by controlling de novo lipogenesis in kidney tubules
Source: PubMed Central journal article supplement (PMC10866669; doi:10.1172/jci172963), 2023-12-05

Full unedited blots for Figure 2D  
ADENINE

Con      WT      ACSS2<sup>-/-</sup>

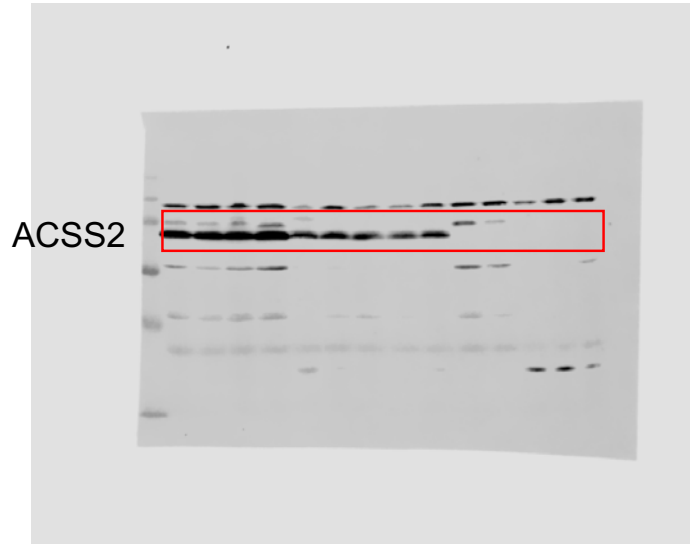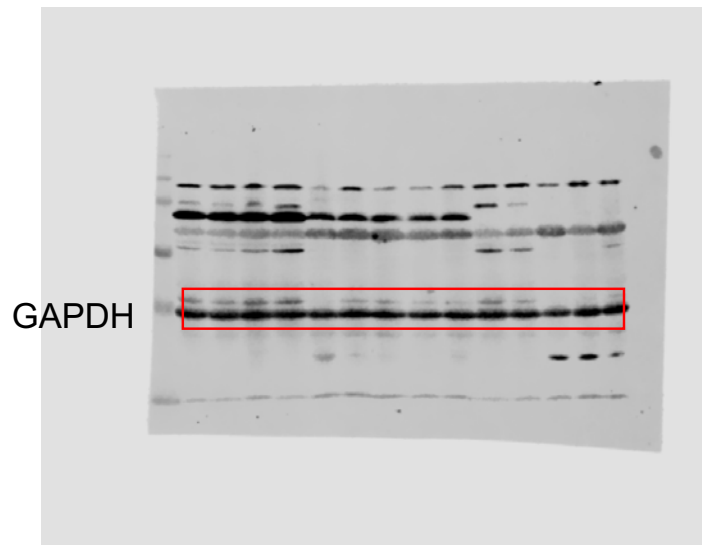

# Full unedited blots for Figure 2F

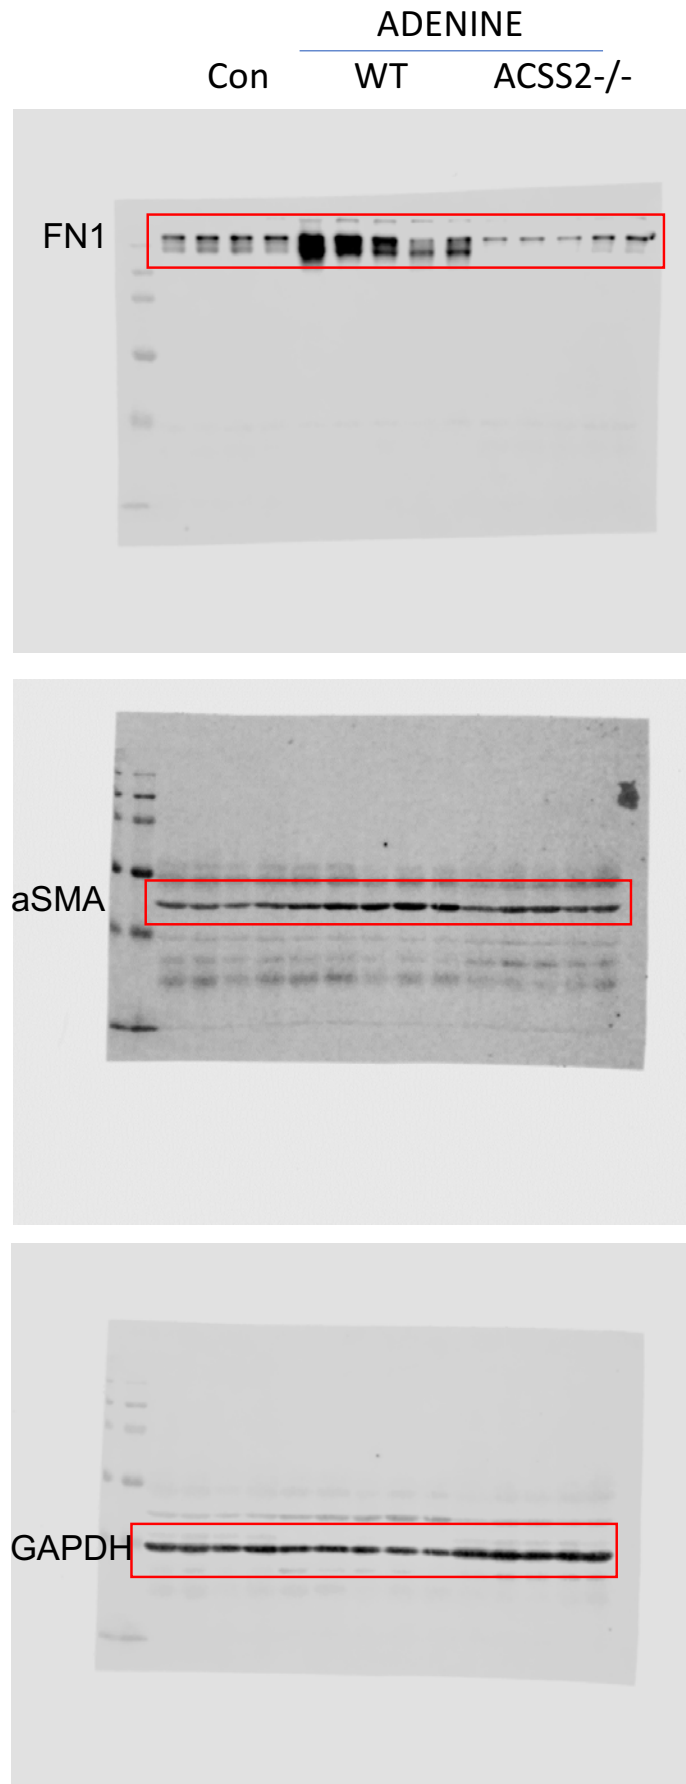

# Full unedited blots for Figure 2K

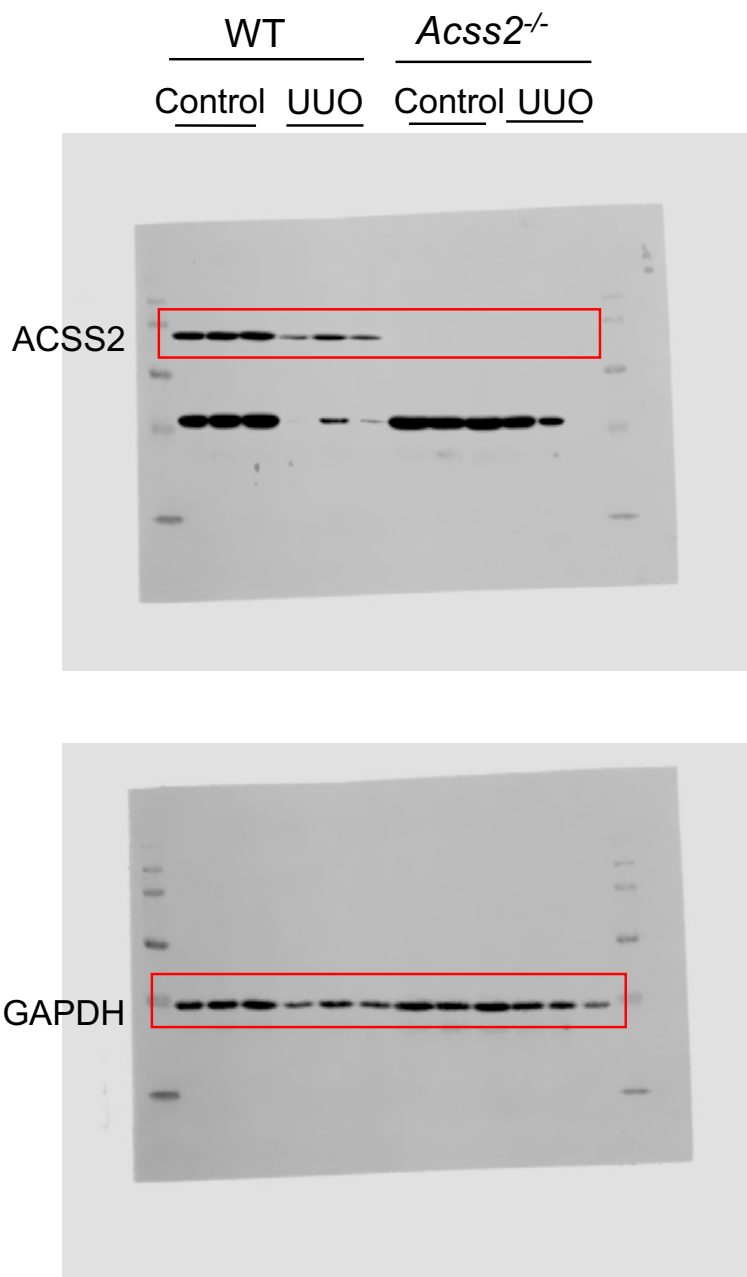

# Full unedited blots for Figure 2L

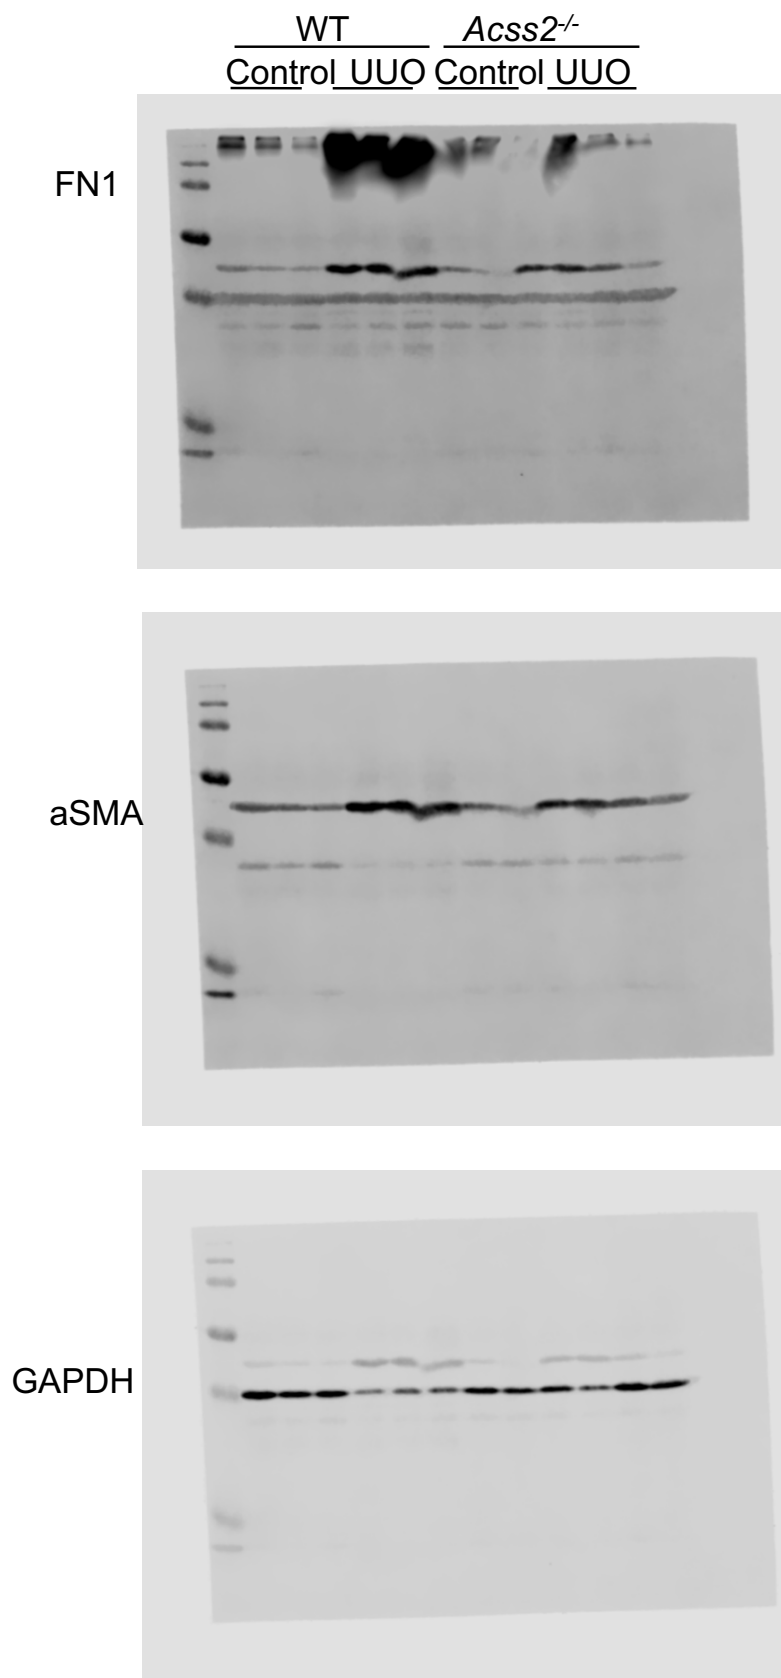

Full unedited blots for Figure 3B  $WT$

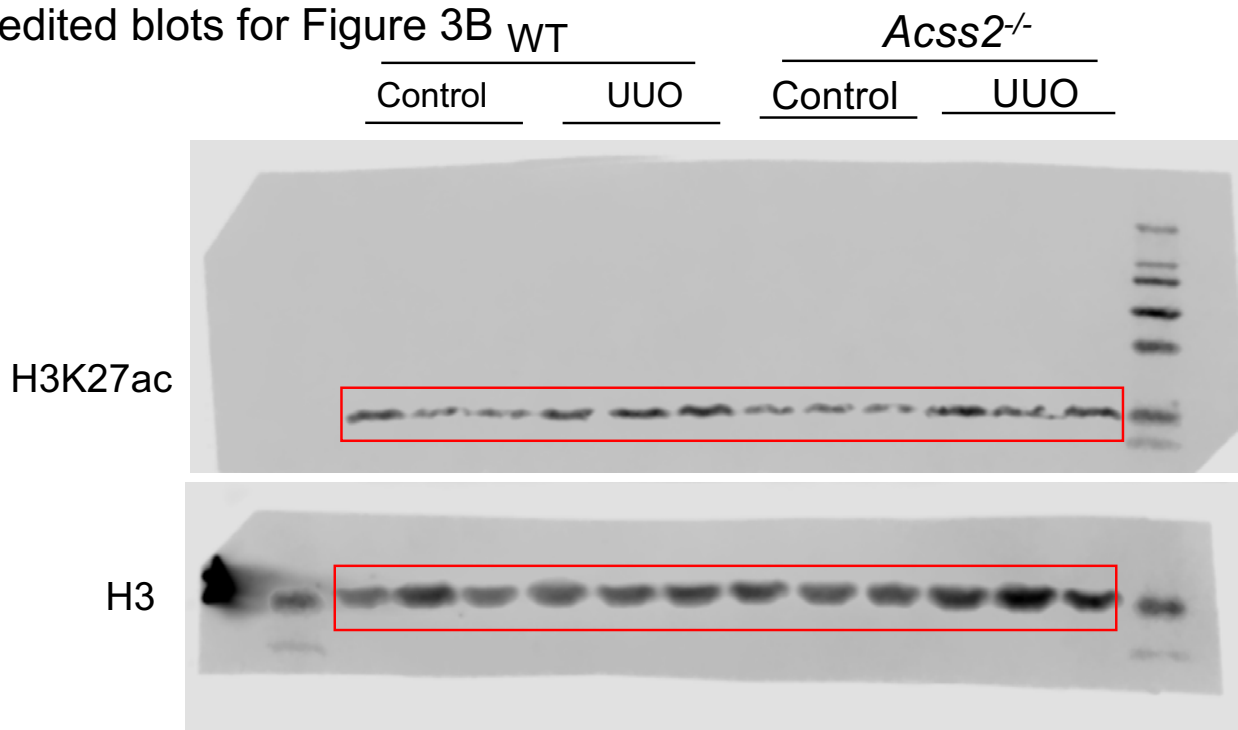

Full unedited blots for Figure 3J

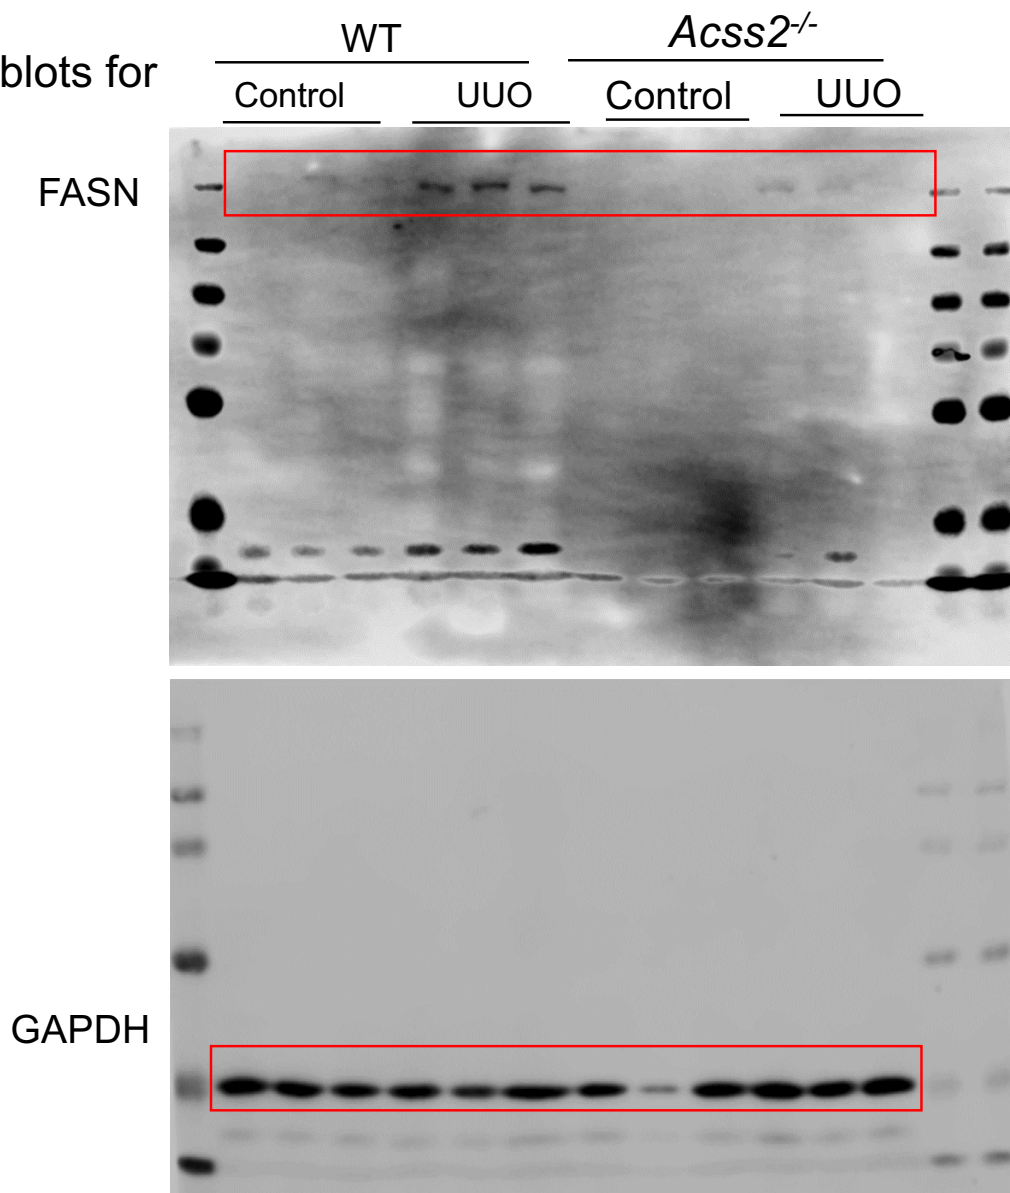

Full unedited blots for Figure 4C

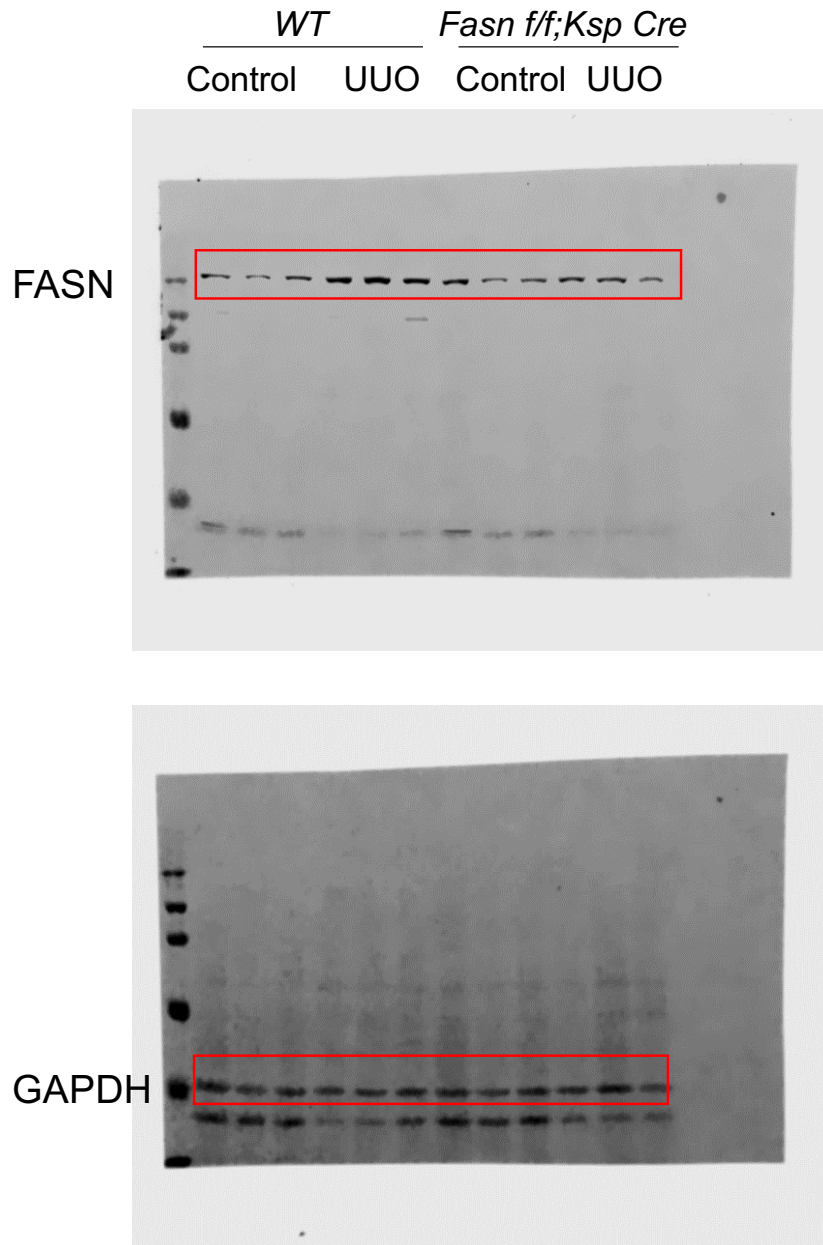

# Full unedited blots for Figure 4E

WT      Fasn f/f;Ksp Cre  
Control UUO    Control UUO

FN

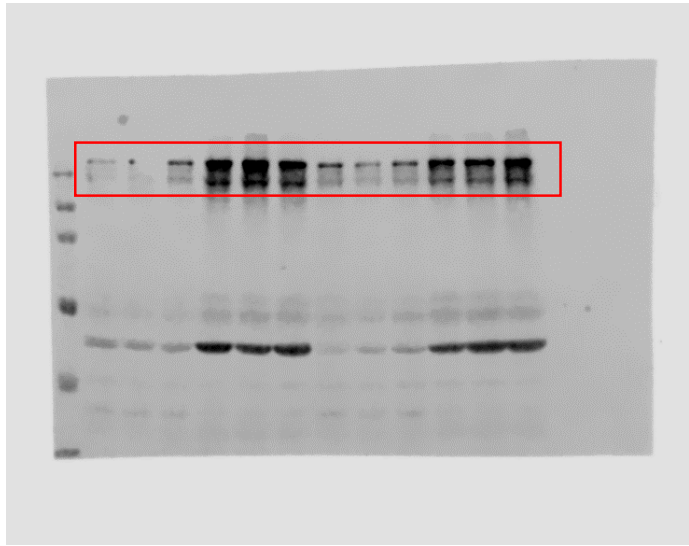

$\alpha$ SMA

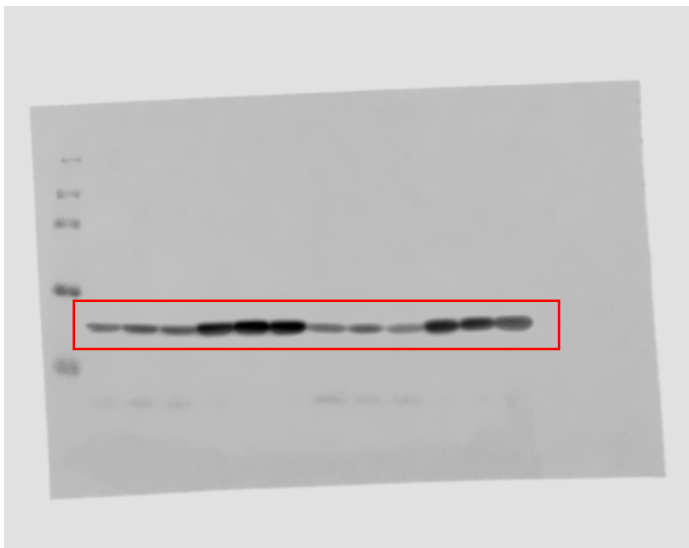

GAPDH

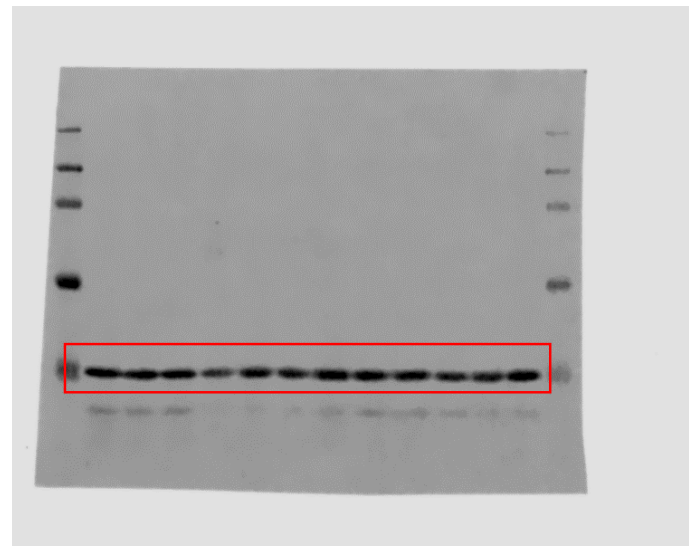

# Full unedited blots for Figure 4J

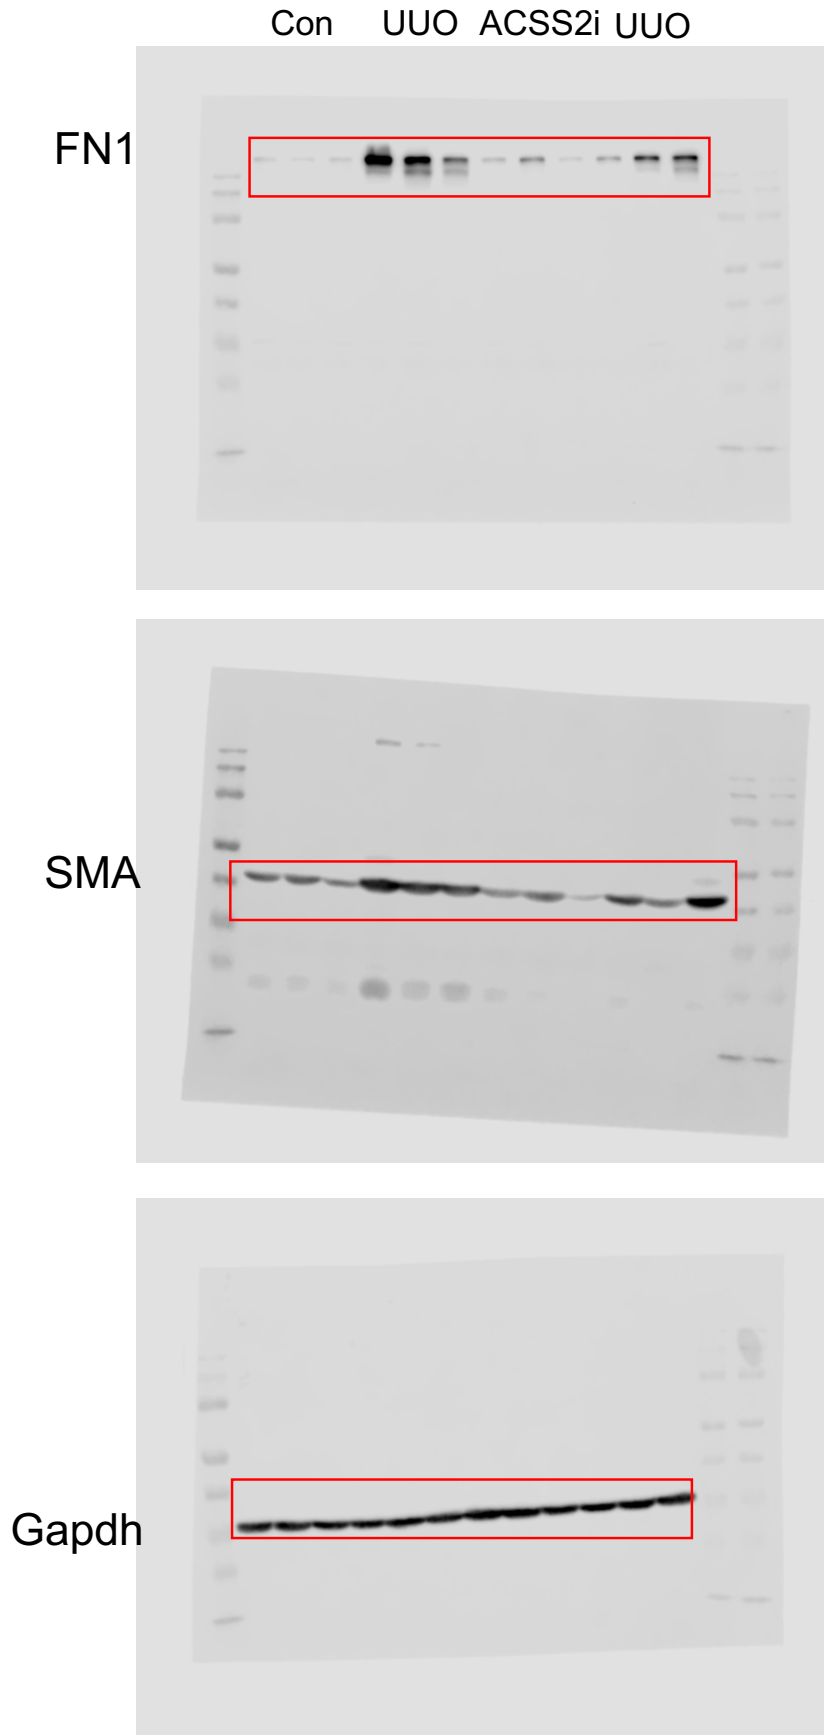



# Full unedited blots for Figure 6B

WT      *Fasn f/f;Ksp Cre*  
Control UO UO Control UO

NLRP3

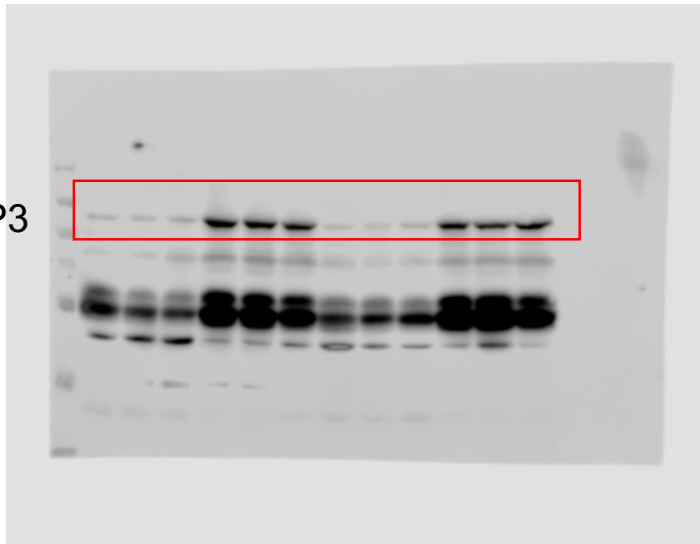

CASP1

P20

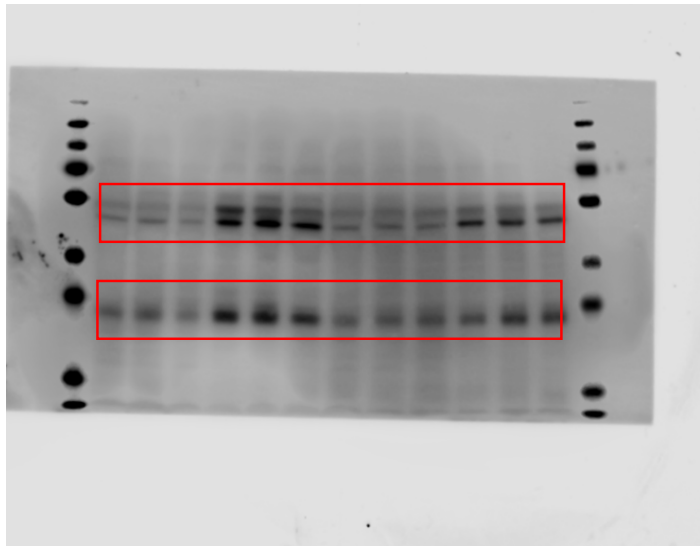

GSDMD-F

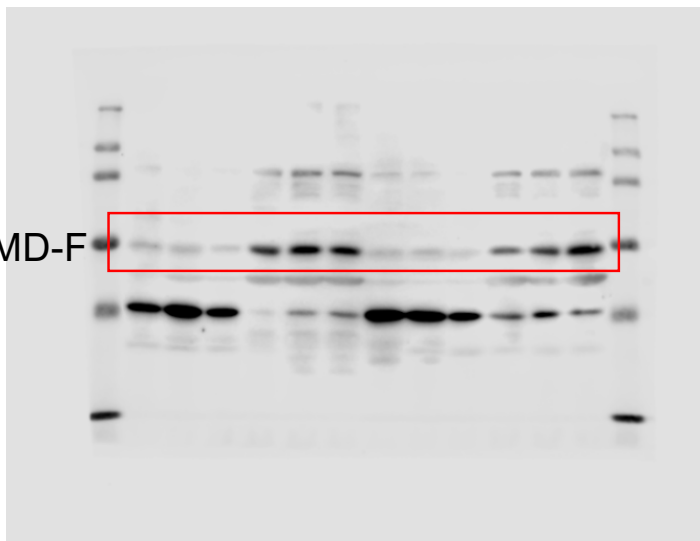

# Full unedited blots for Figure 6B

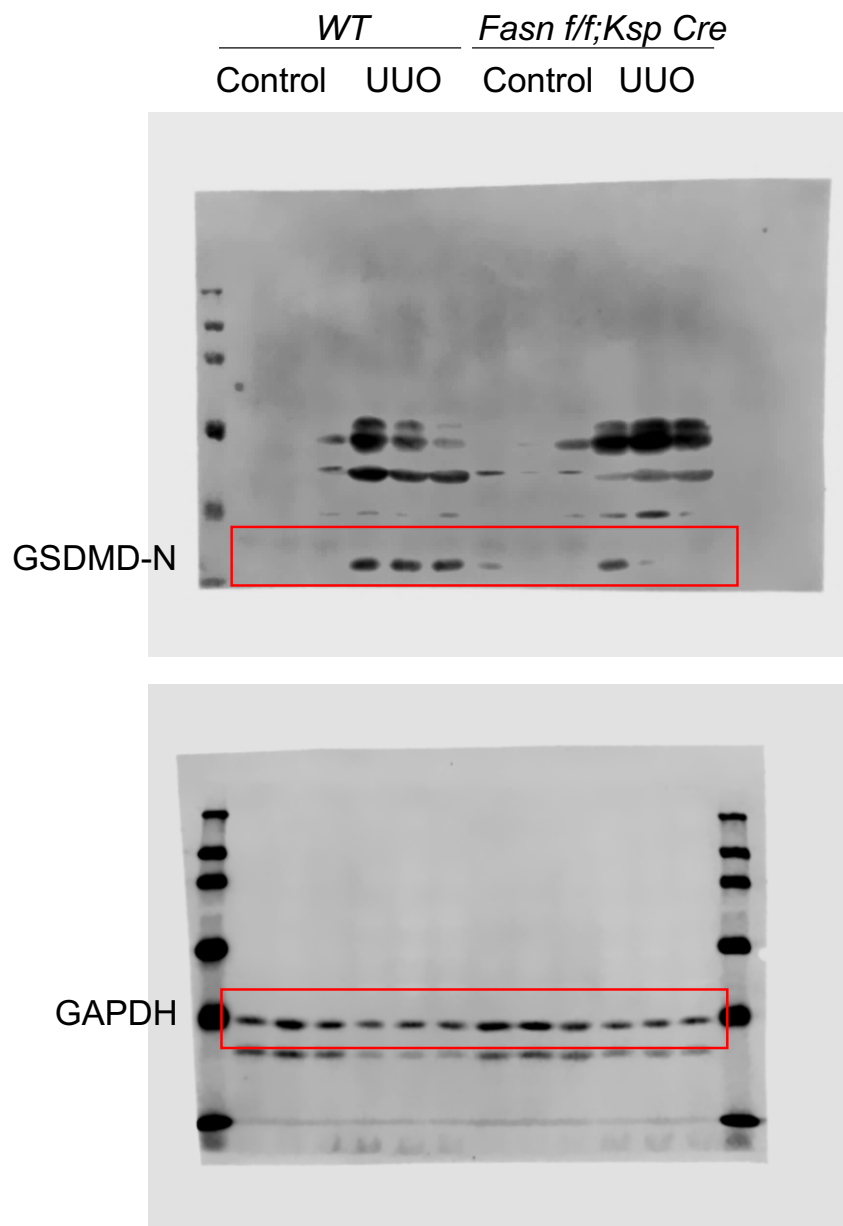

Full unedited blots for Figure 6E

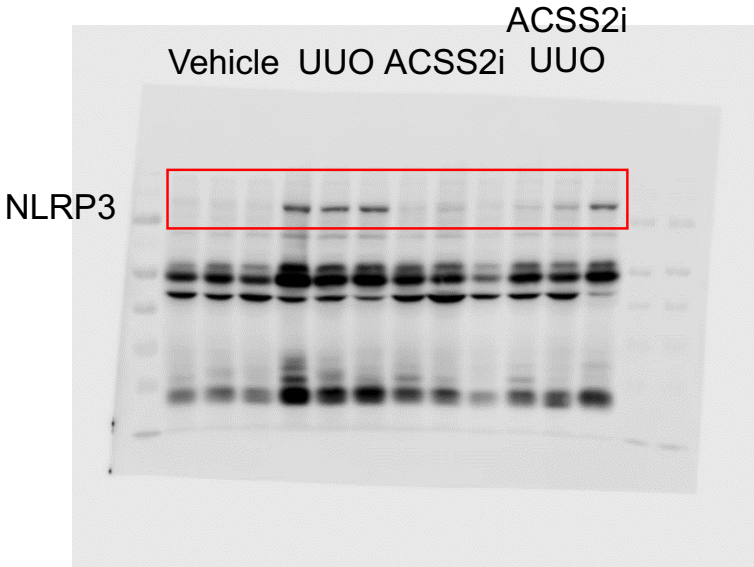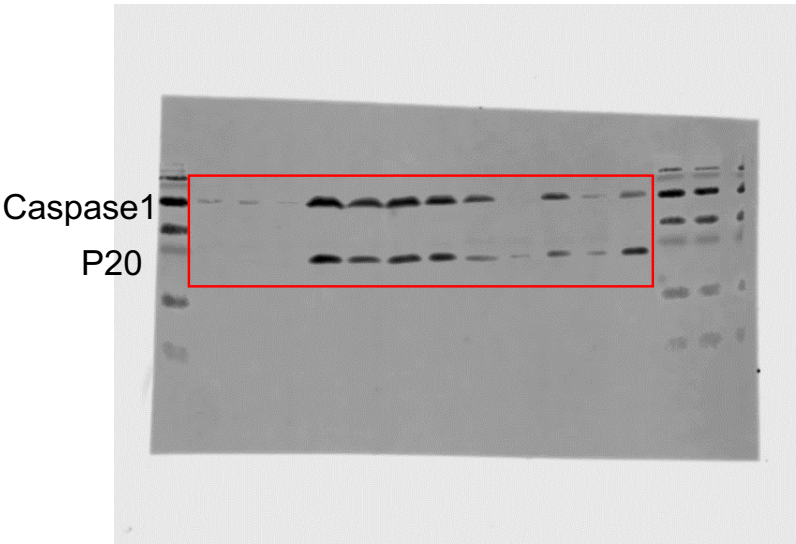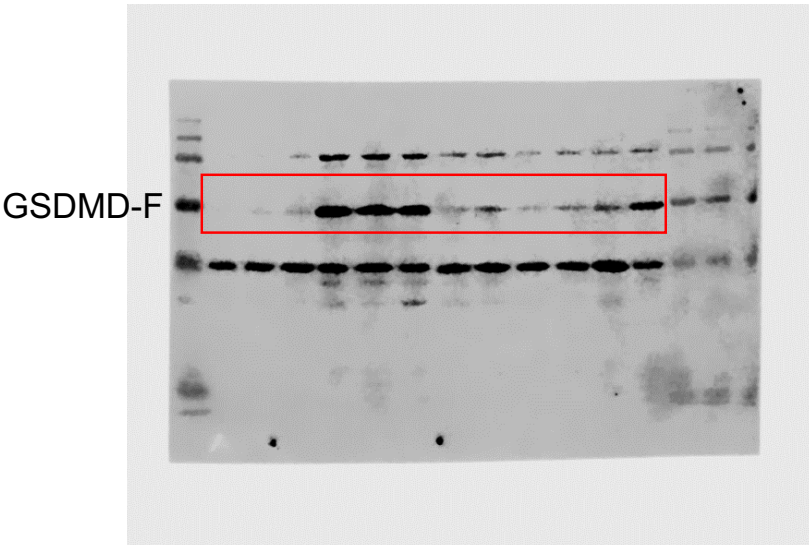

# Full unedited blots for Figure 6E

Vehicle UO ACSS2i ACSS2i  
UO UO

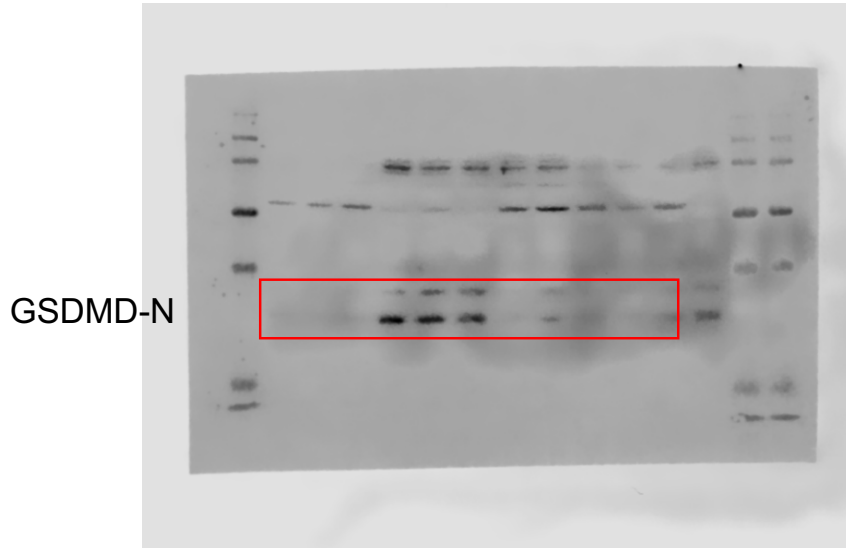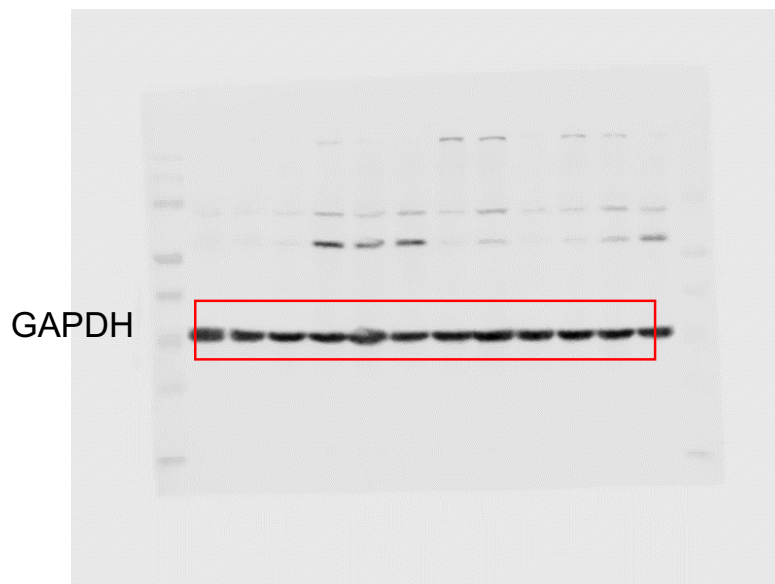

# Full unedited blots for Figure 6H

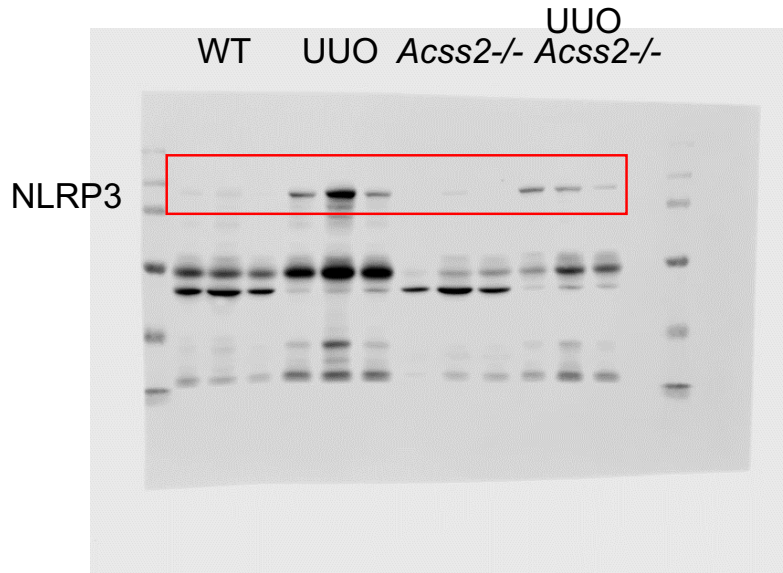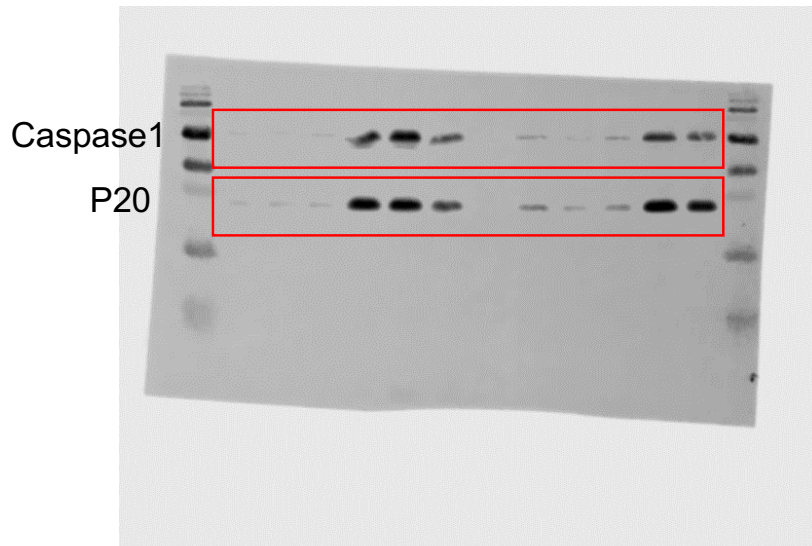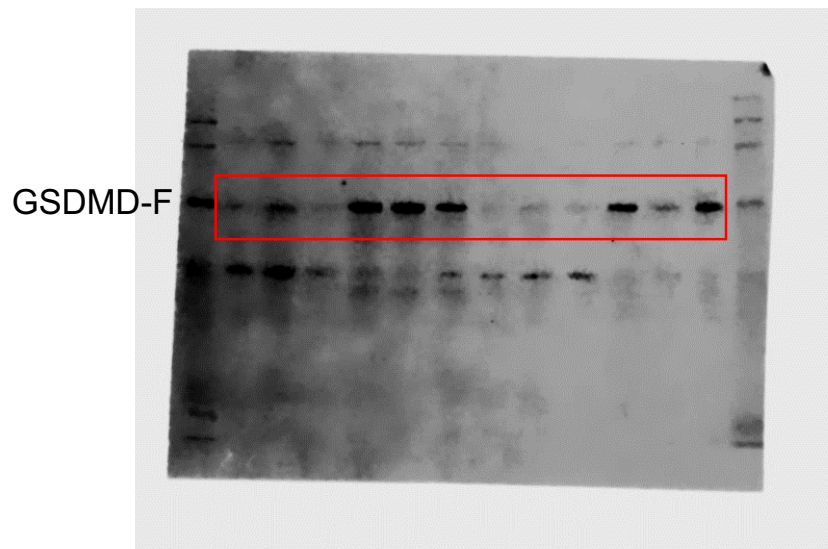

# Full unedited blots for Figure 6H

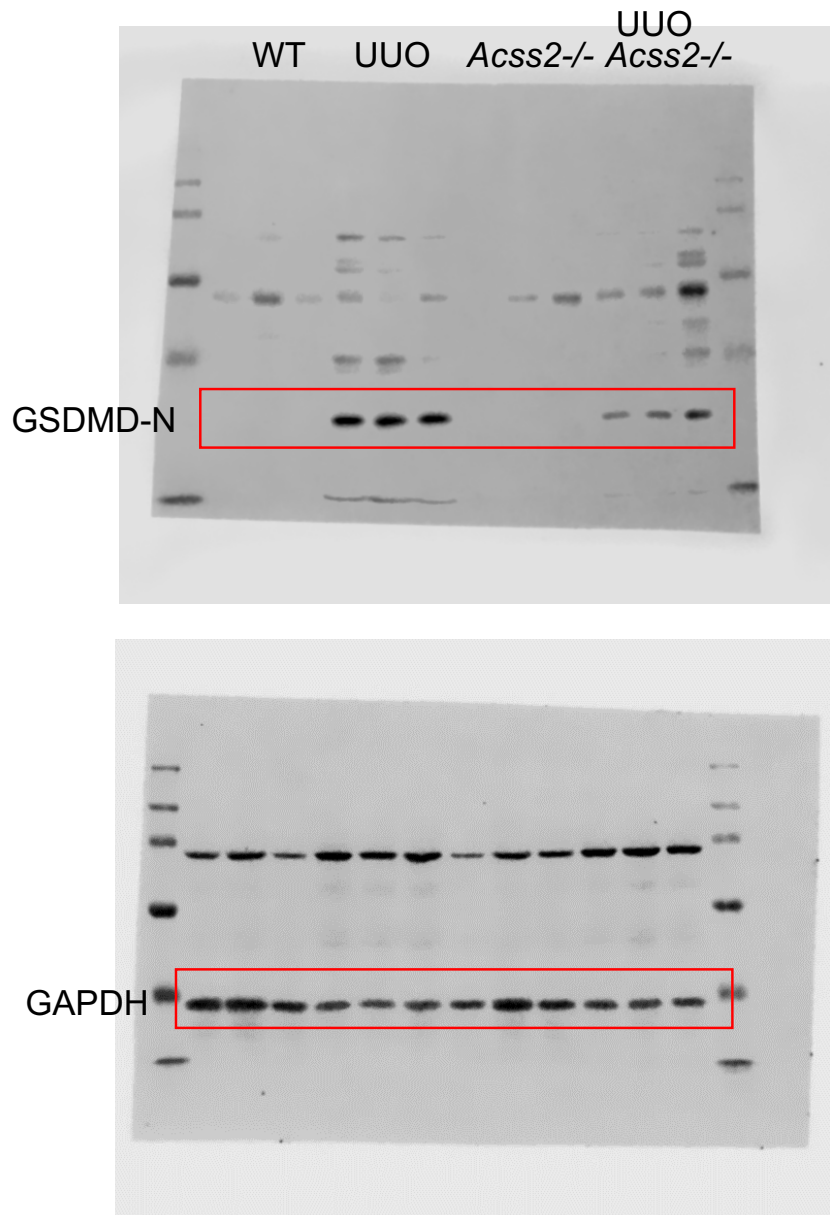

# Full unedited blots for Figure 6J

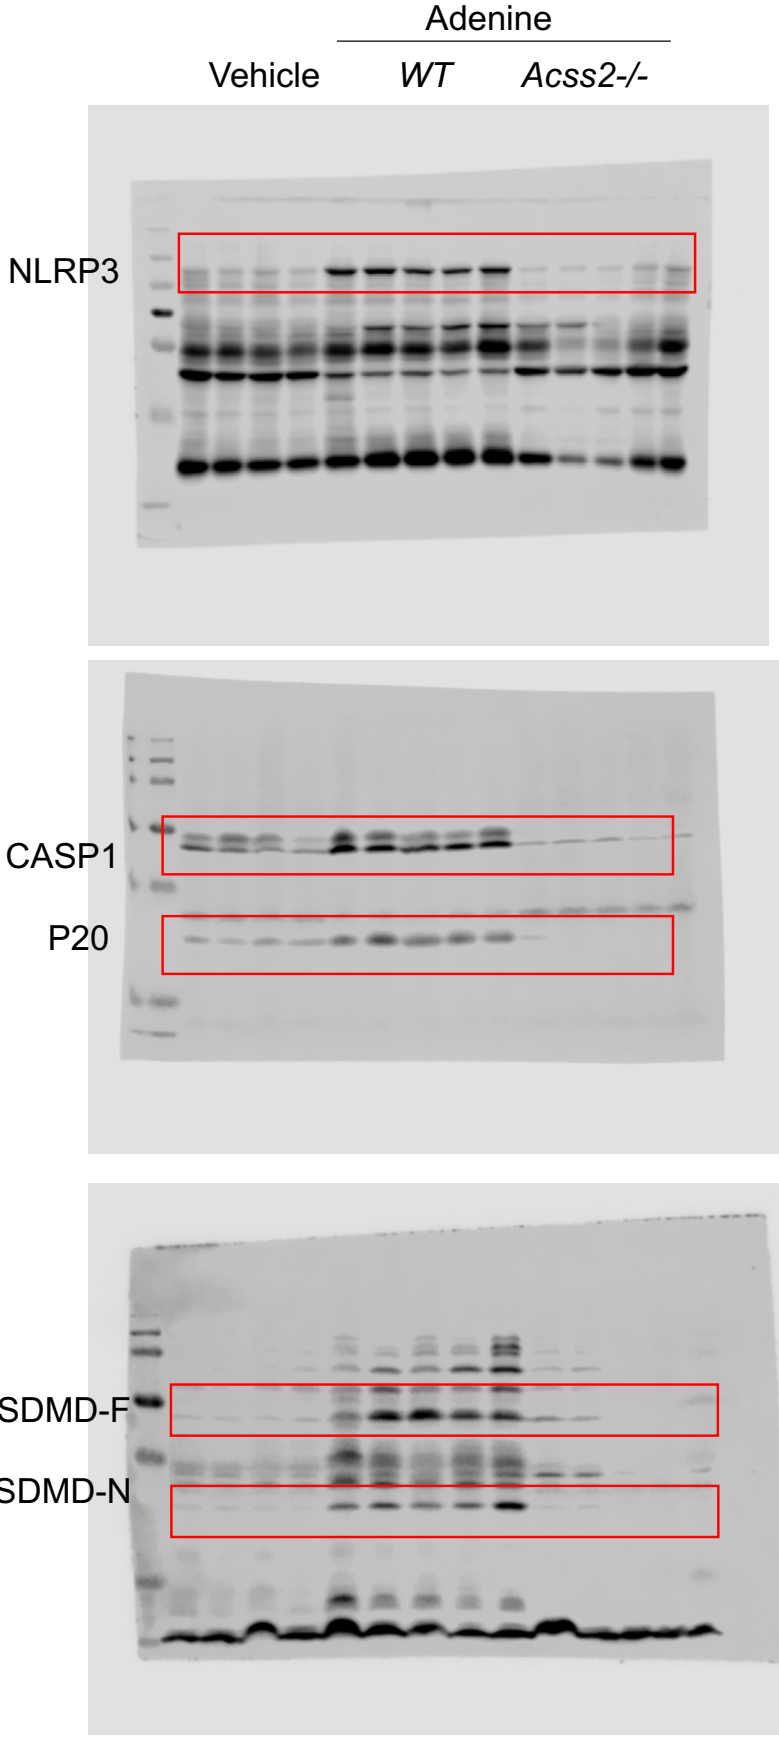

# Full unedited blots for Figure 6J

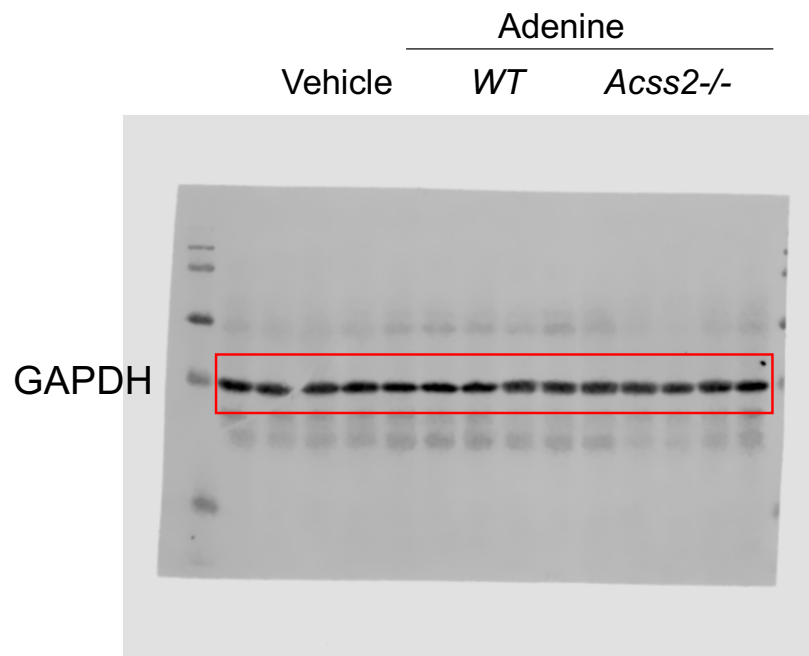



# Full unedited blots for Figure 7H

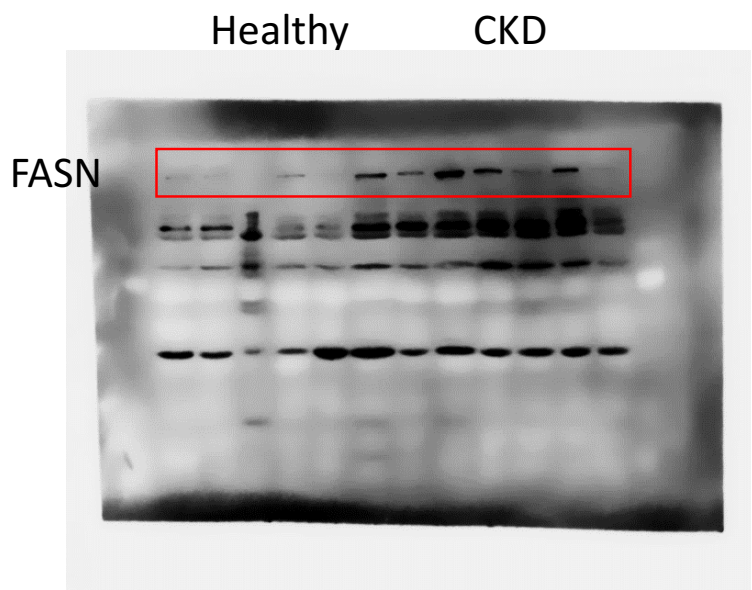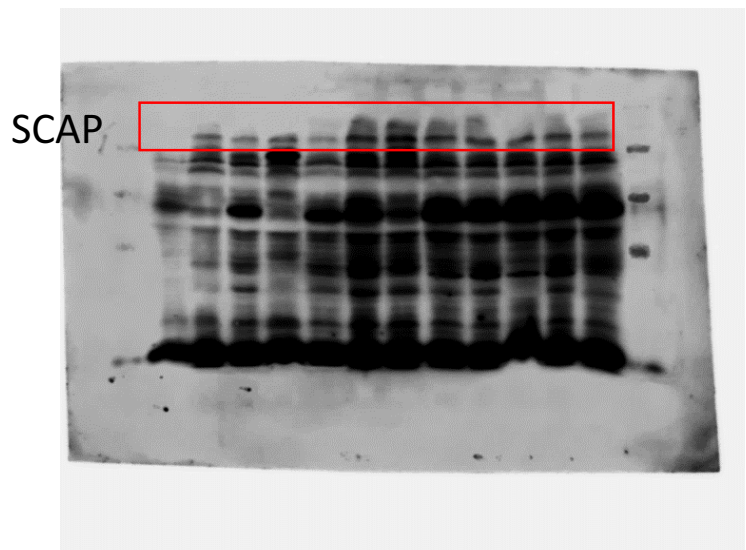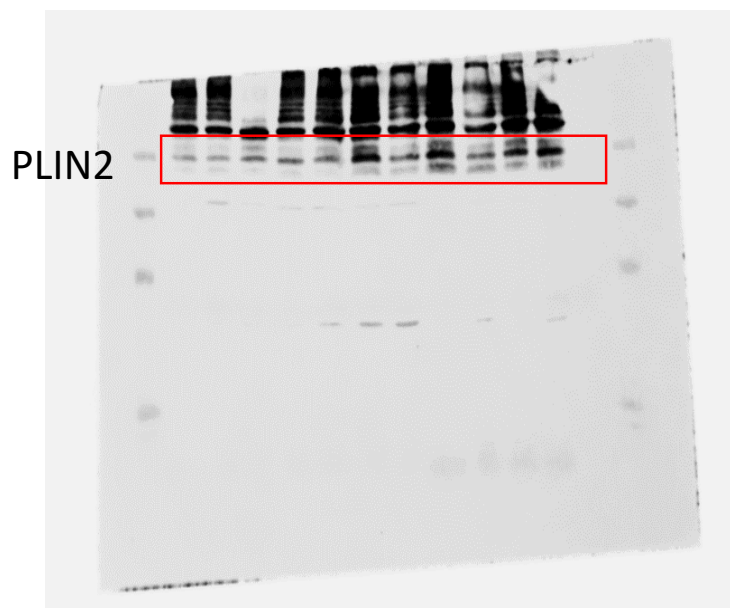

Full unedited blots for Figure 7H

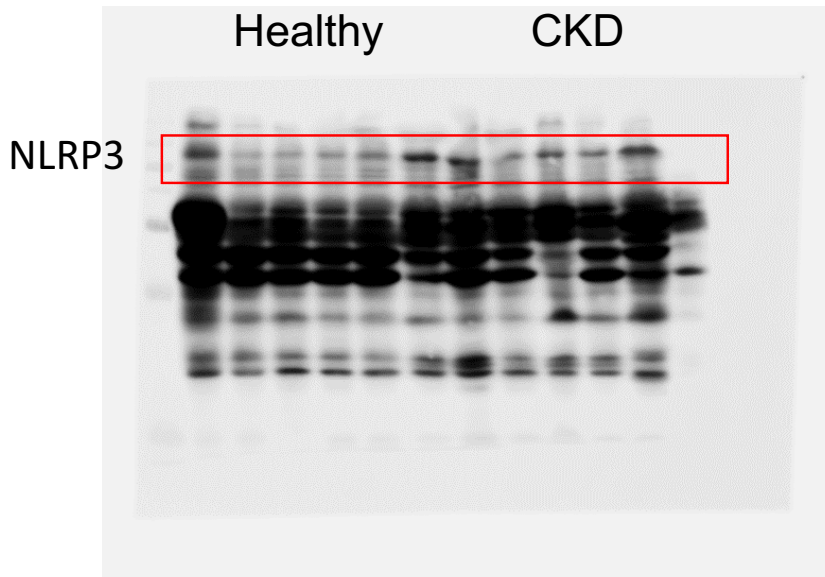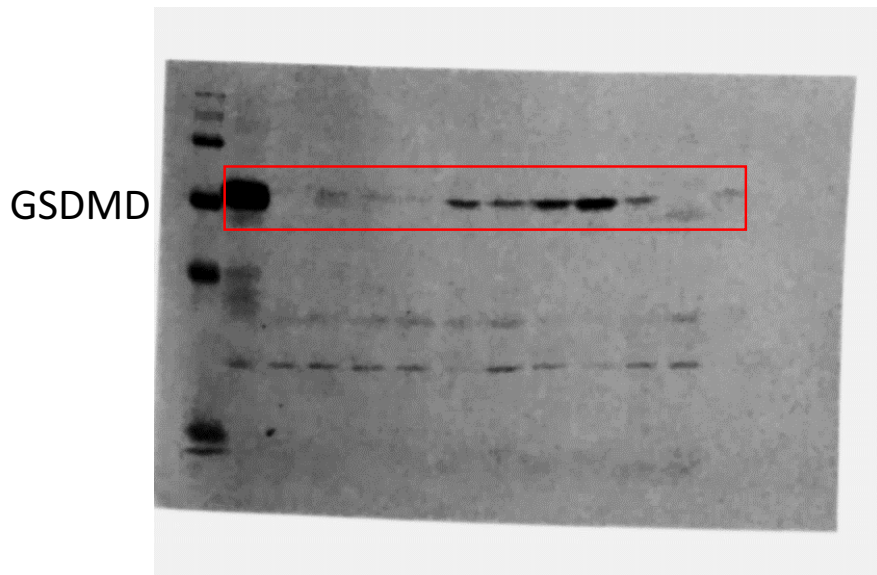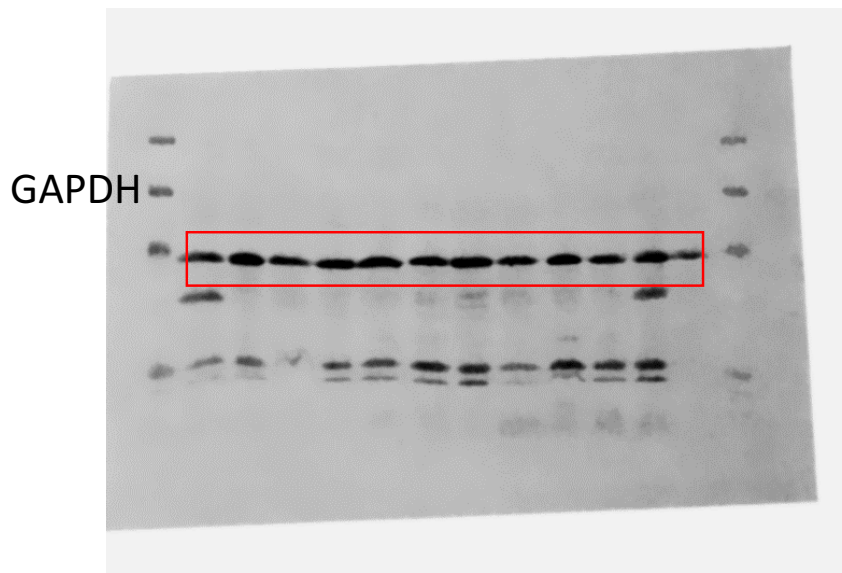

Full unedited blots for supplementary figure 1F

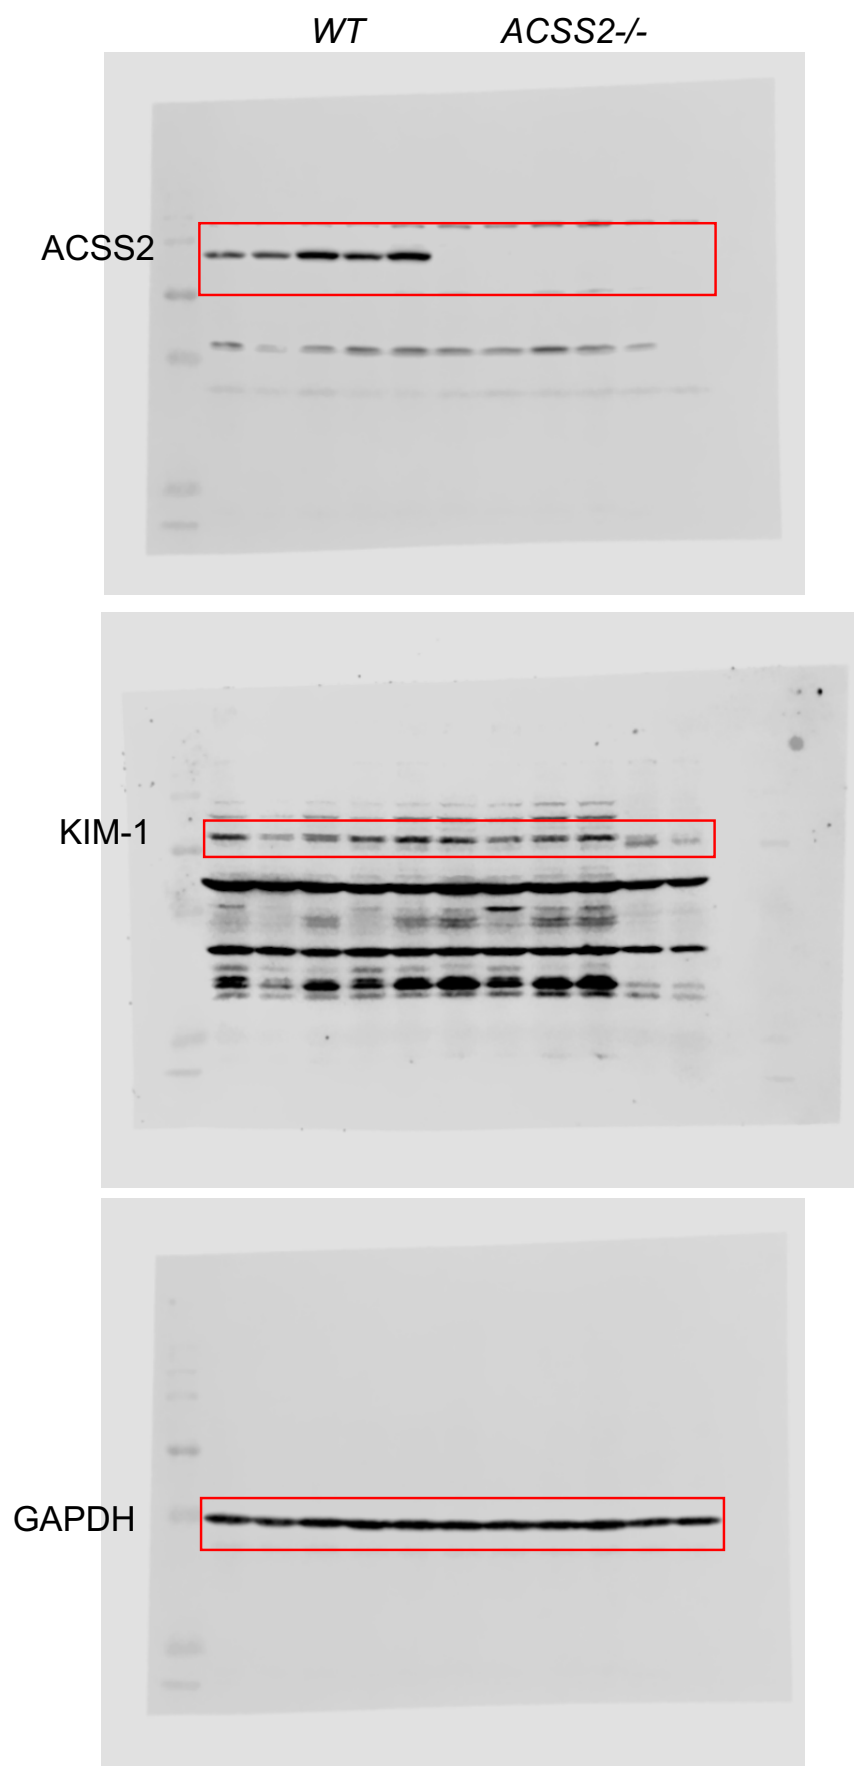

Full unedited blots for supplementary figure 2G

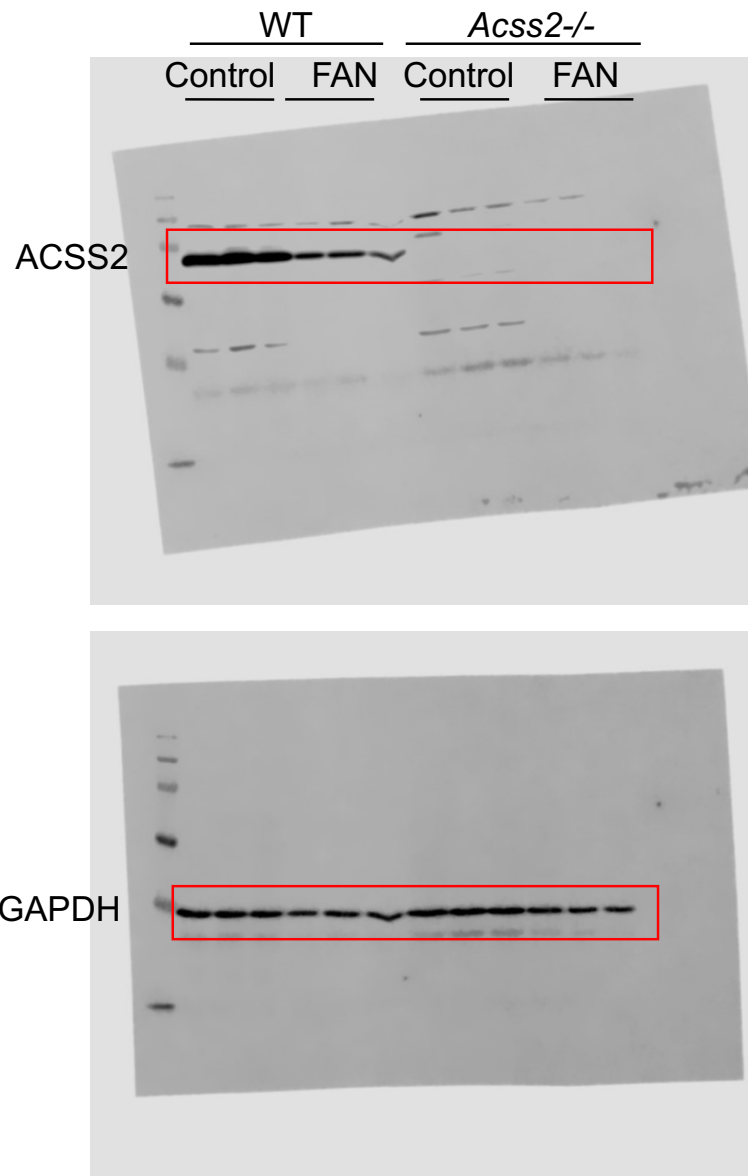

# Full unedited blots for supplementary figure 2G

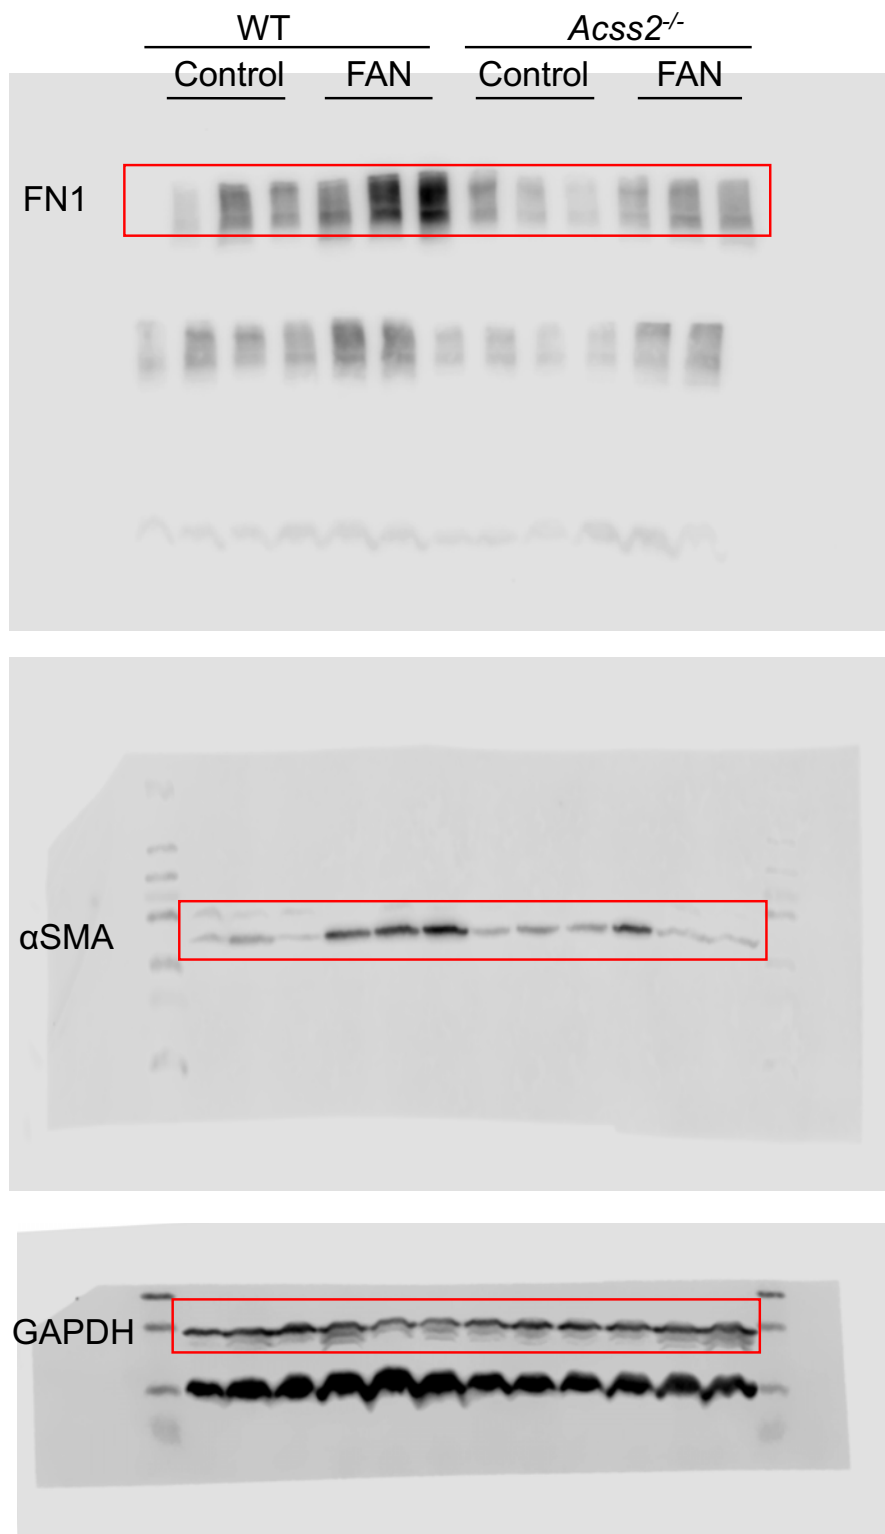

Full unedited blots for supplementary figure 2R

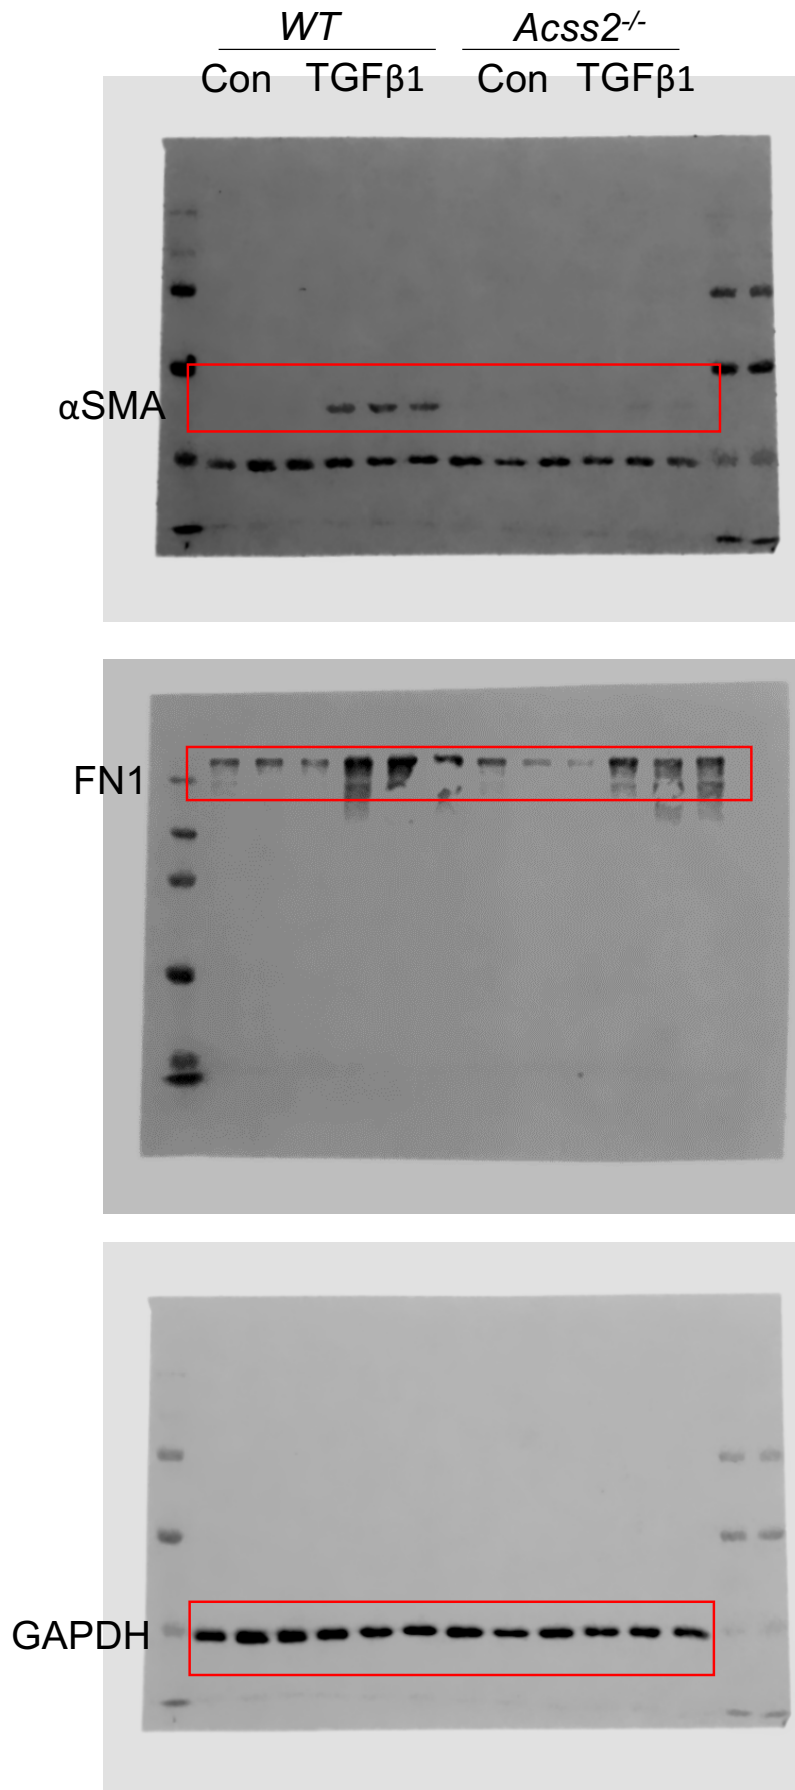

Full unedited blots for supplementary figure 4I

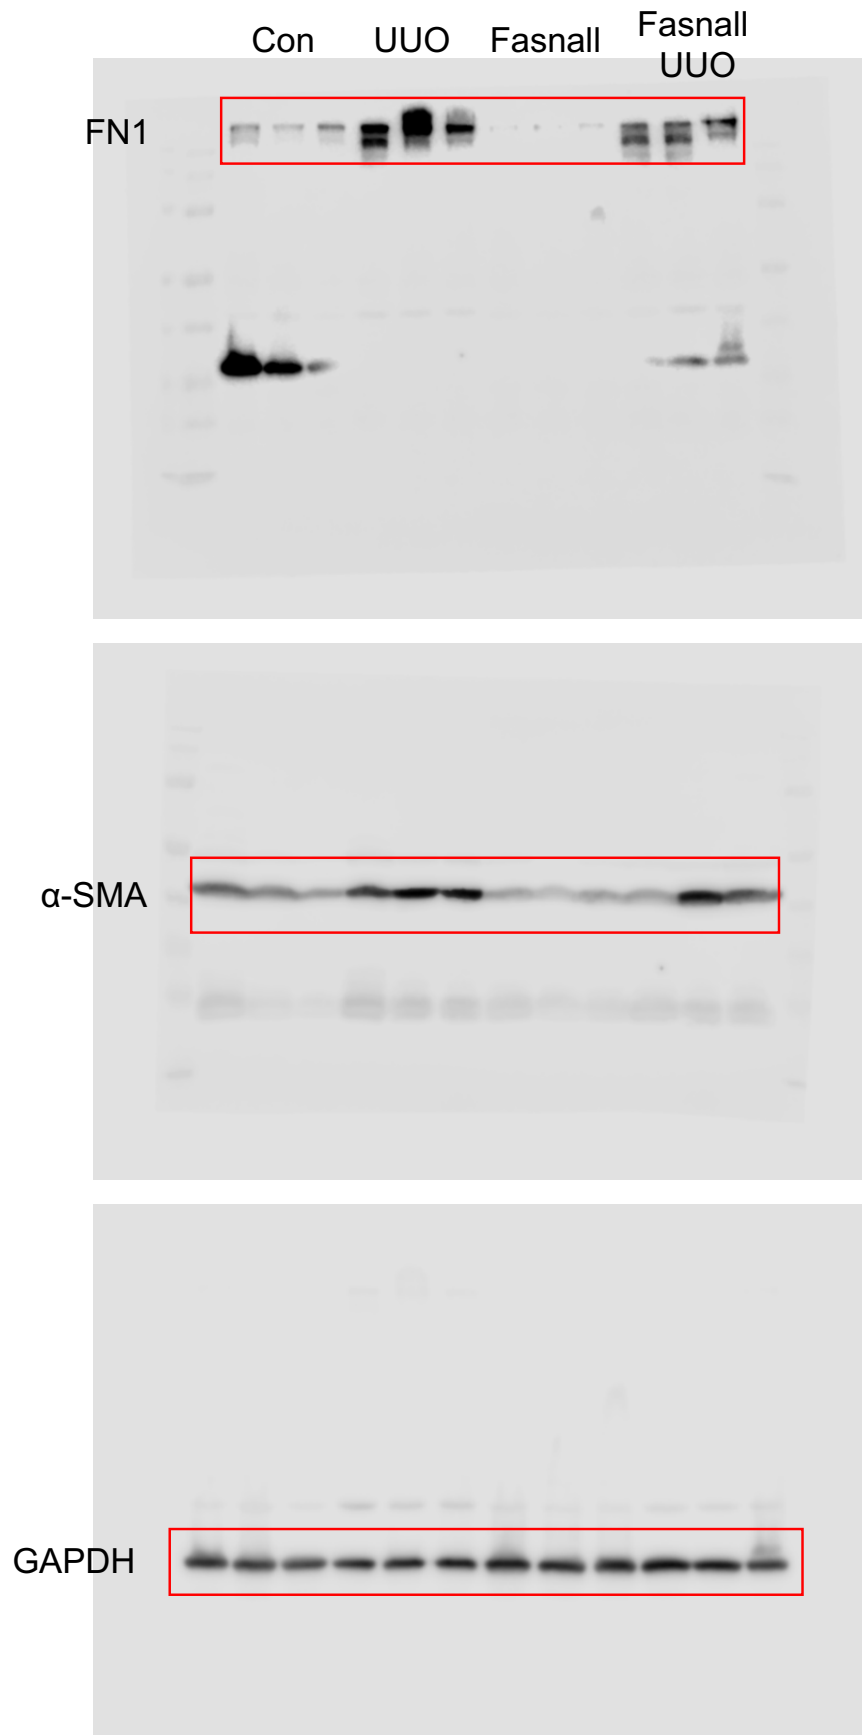

Full unedited blots for supplementary figure 4R

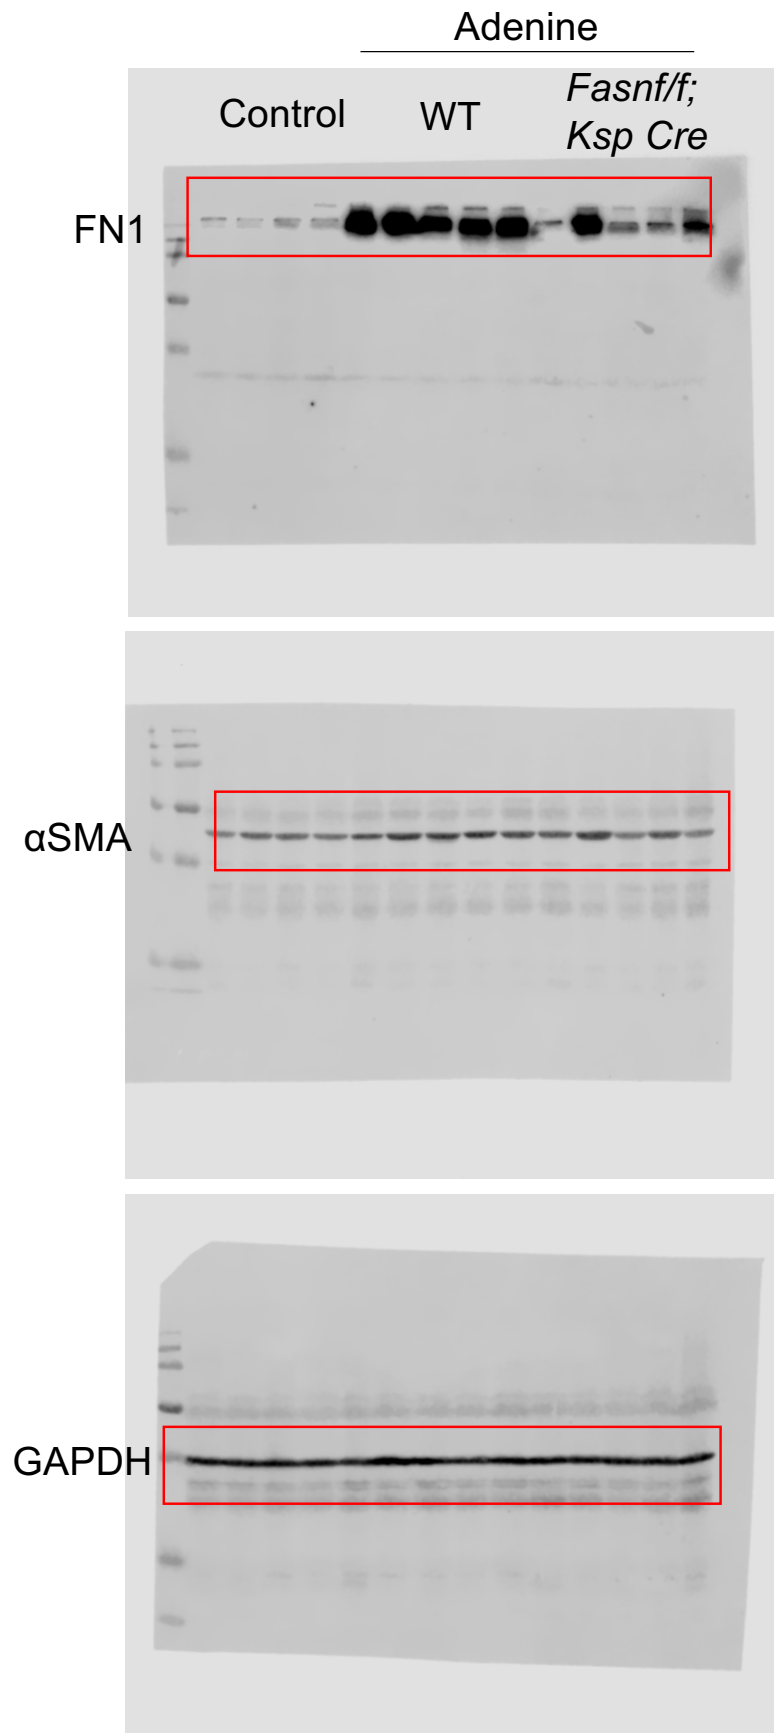



Full unedited blots for supplementary figure 5C

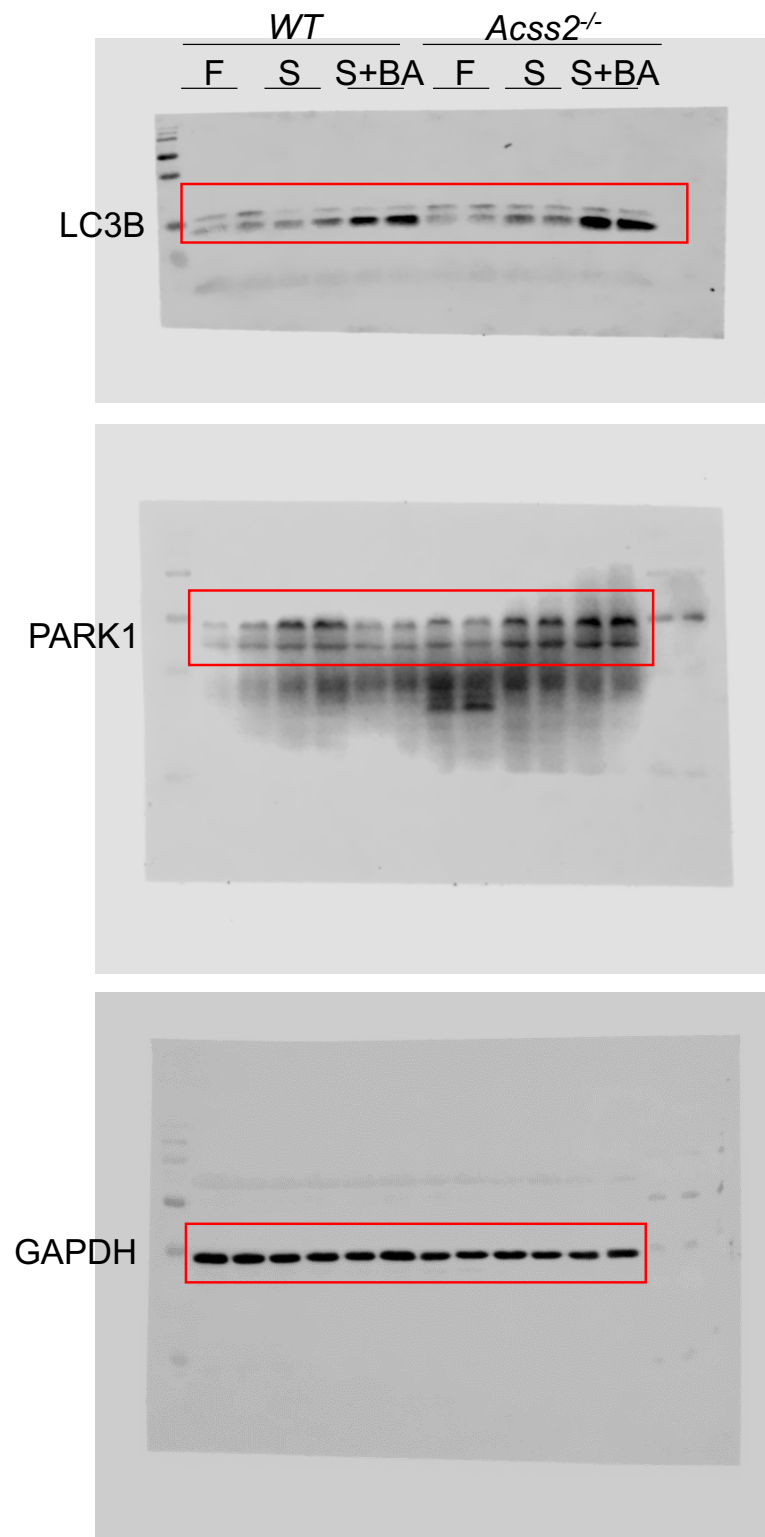

Full unedited blots for supplementary figure 6F

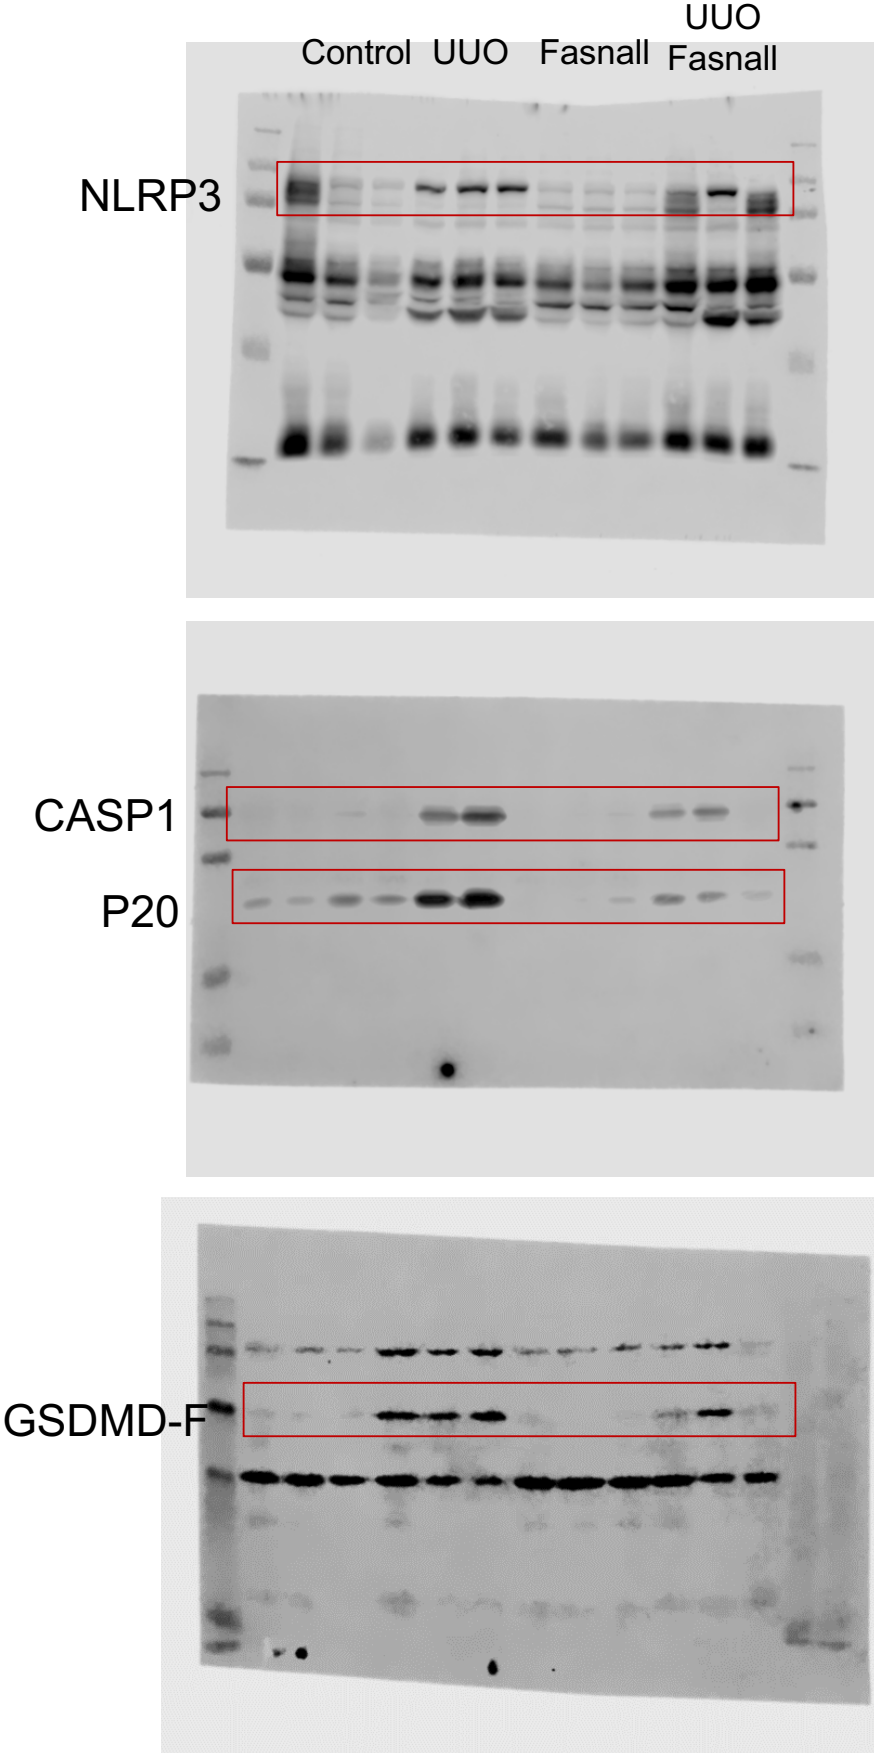

Full unedited blots for supplementary figure 6F

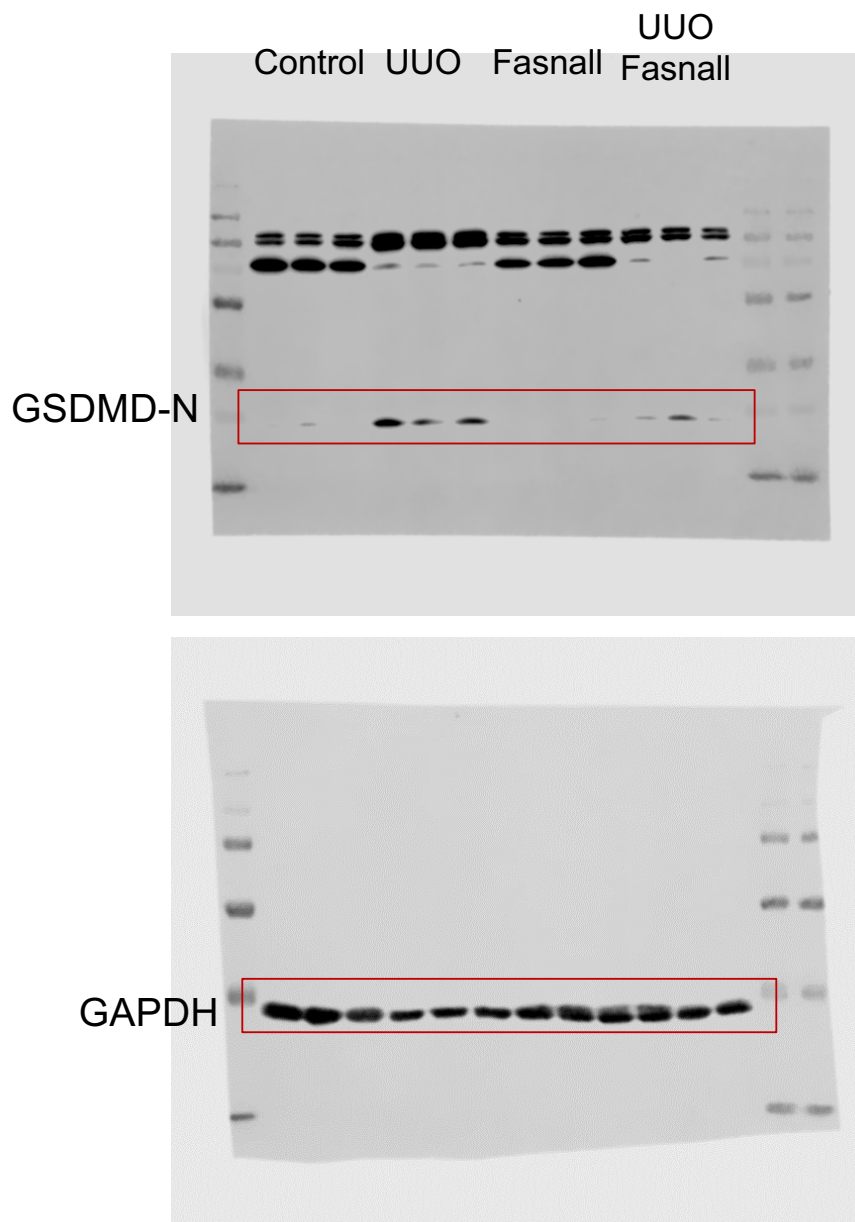

# Full unedited blots for supplementary figure 6J

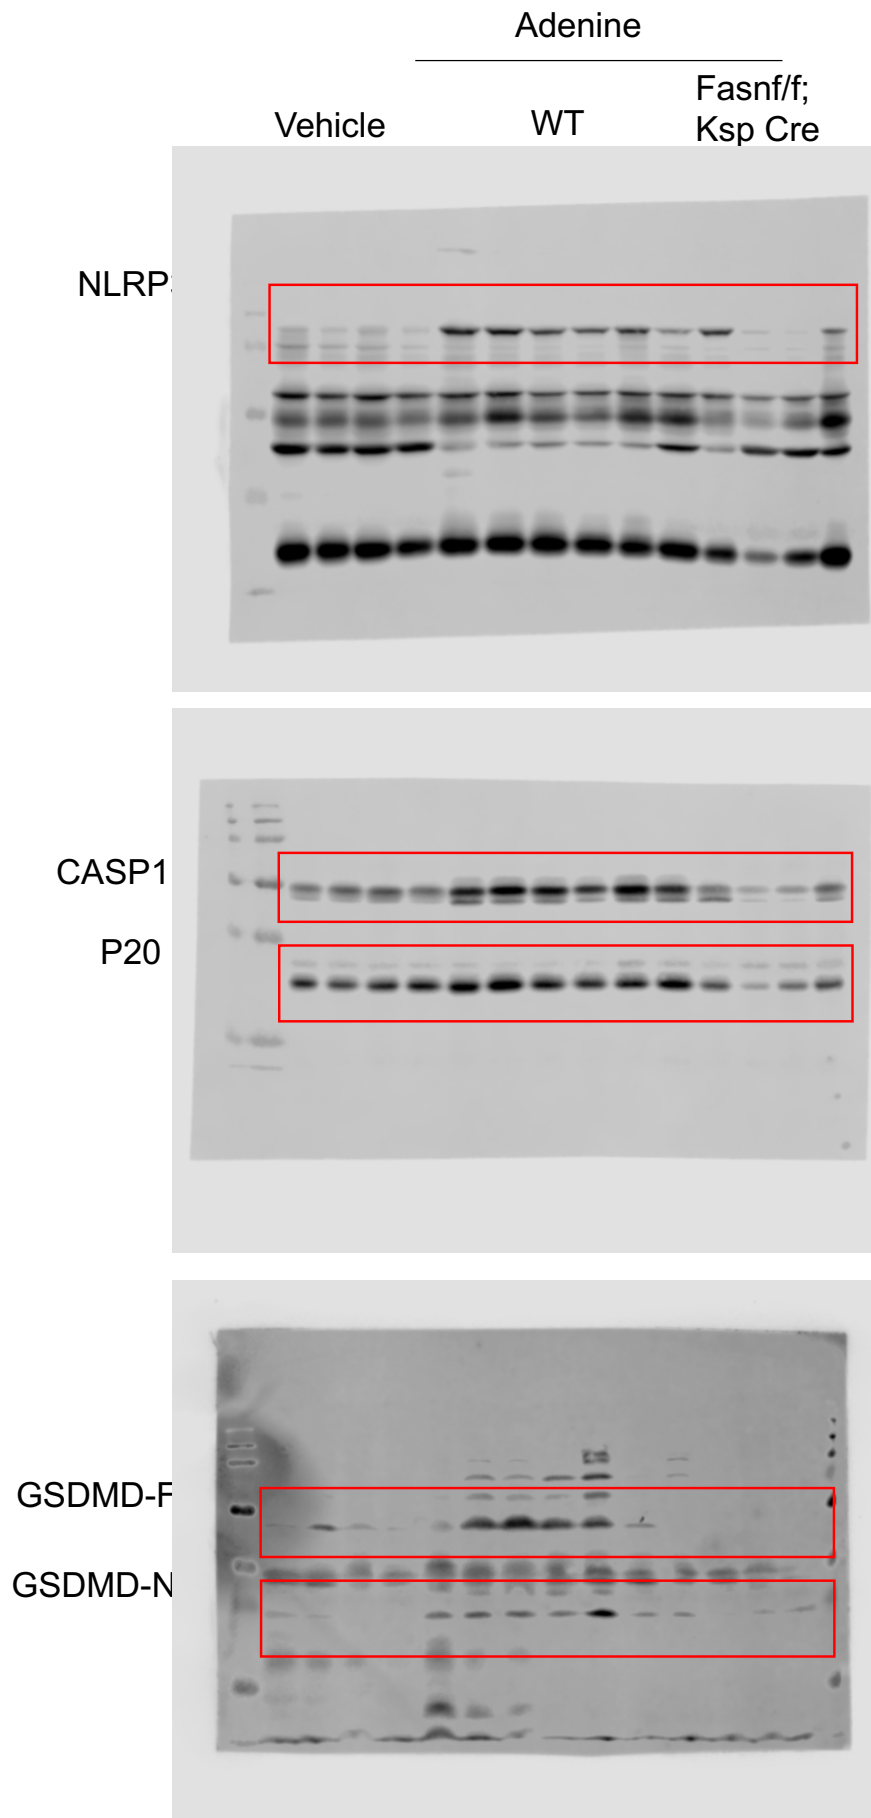

Full unedited blots for supplementary figure 6J

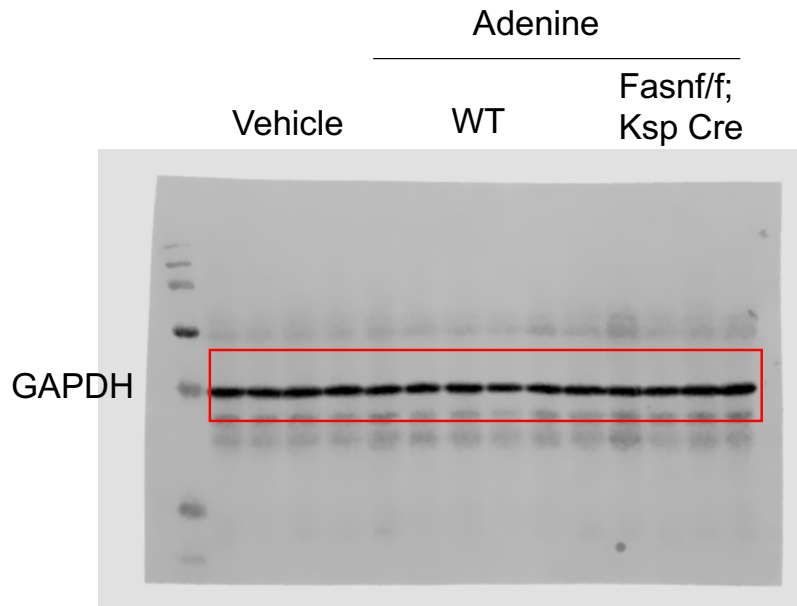

Supplement: jci-134-172963-s269.pdf [file jci-134-172963-s269.pdf]
